# Supplementary figures and images for: Silver-catalyzed [3+2]-cycloaddition of benzynes with diazocarbonyl species via a postulated (1H-indazol-1-yl)silver intermediate
Source: Royal Society of Chemistry journal article supplement (doi:10.1039/c2ob26760h), 2012-01-01

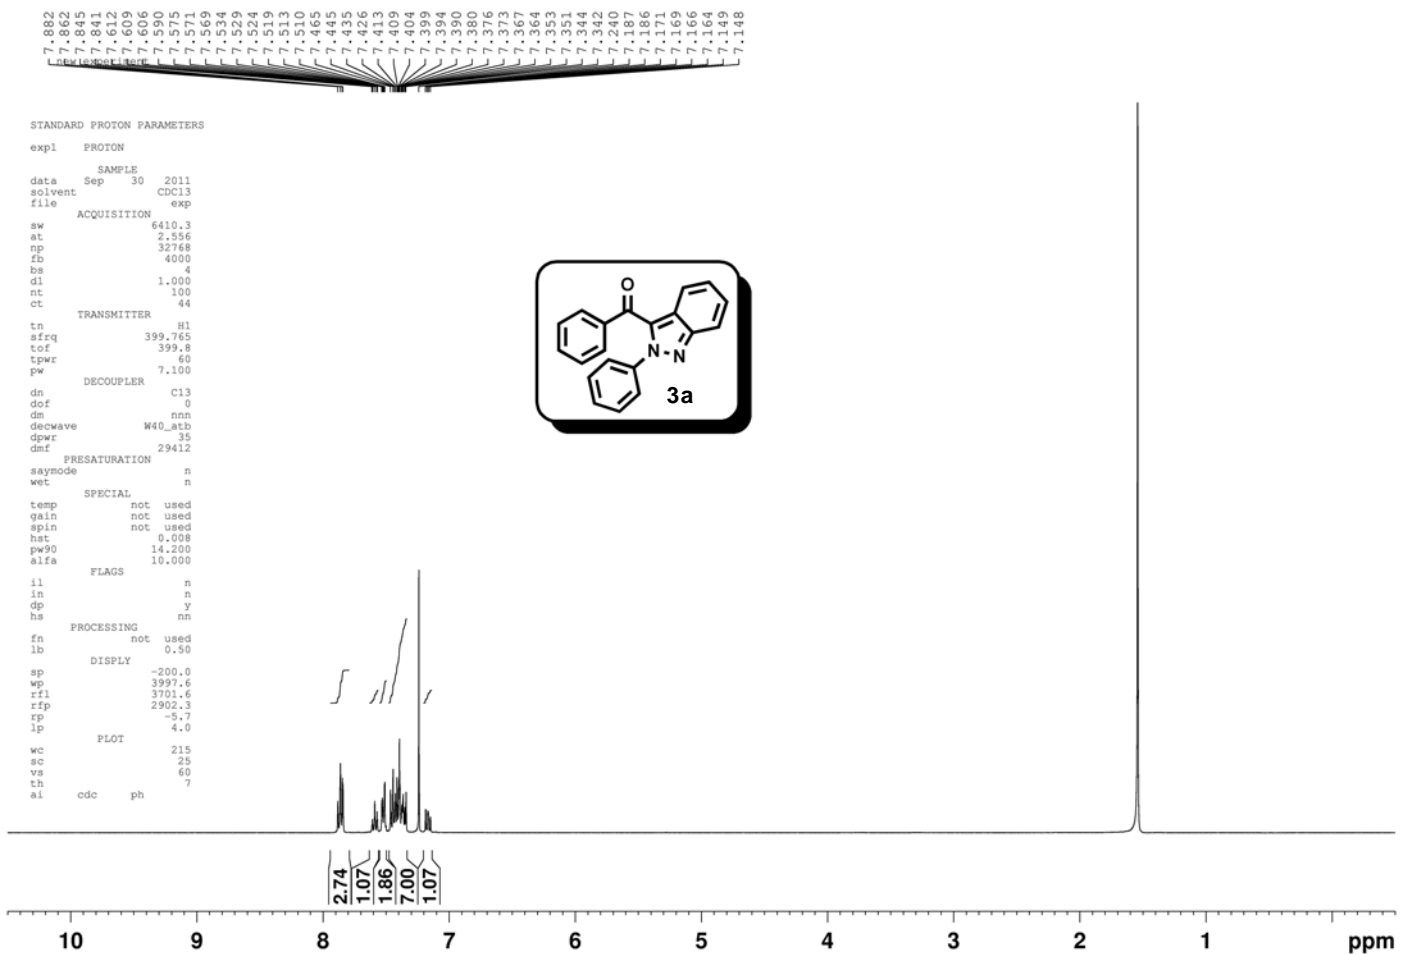

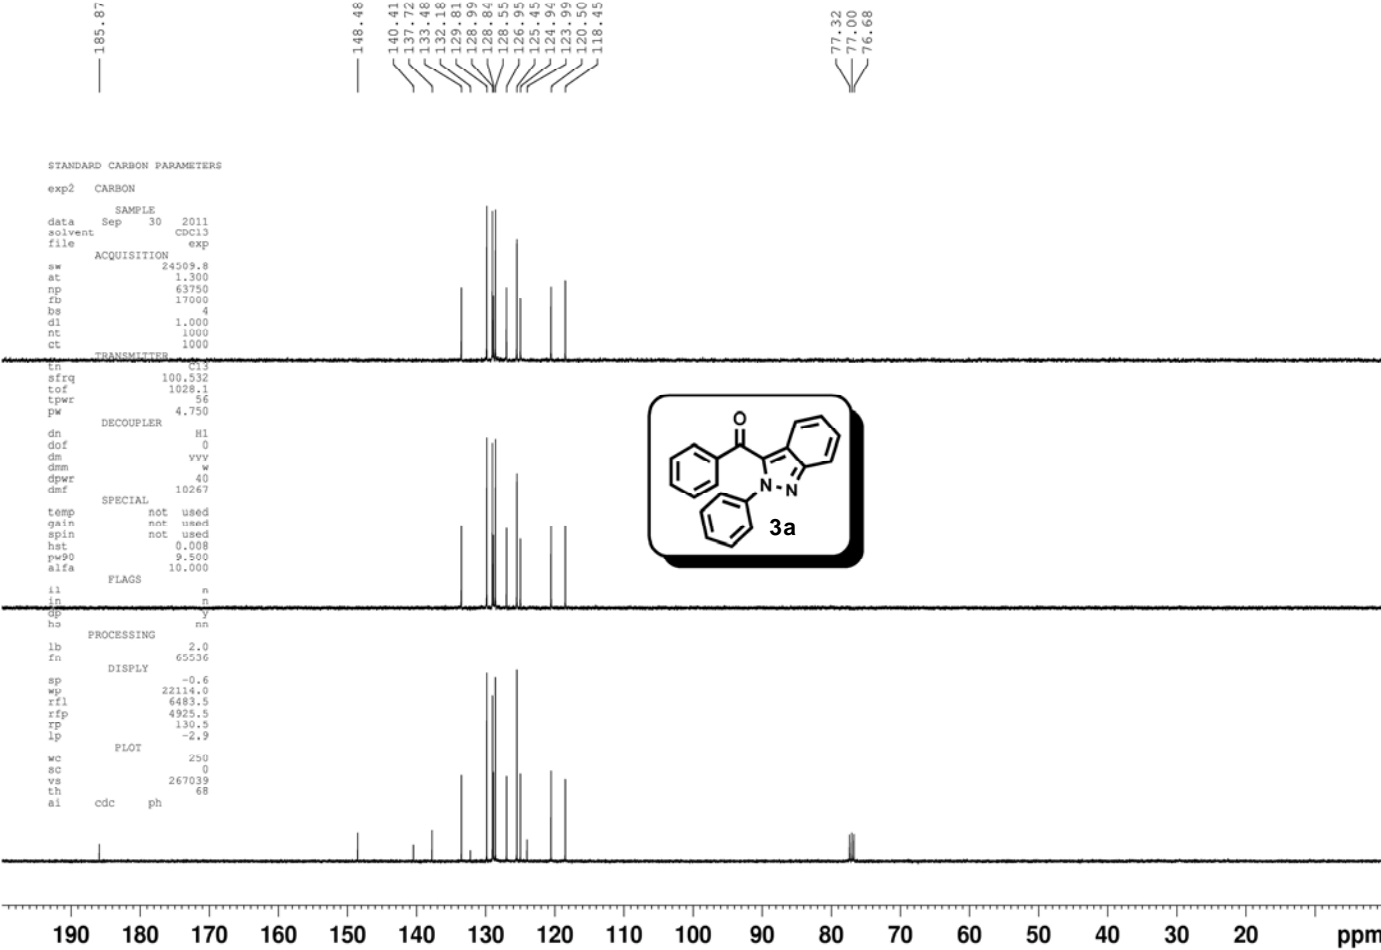

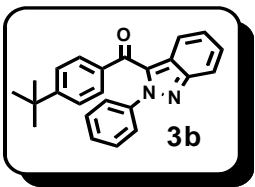

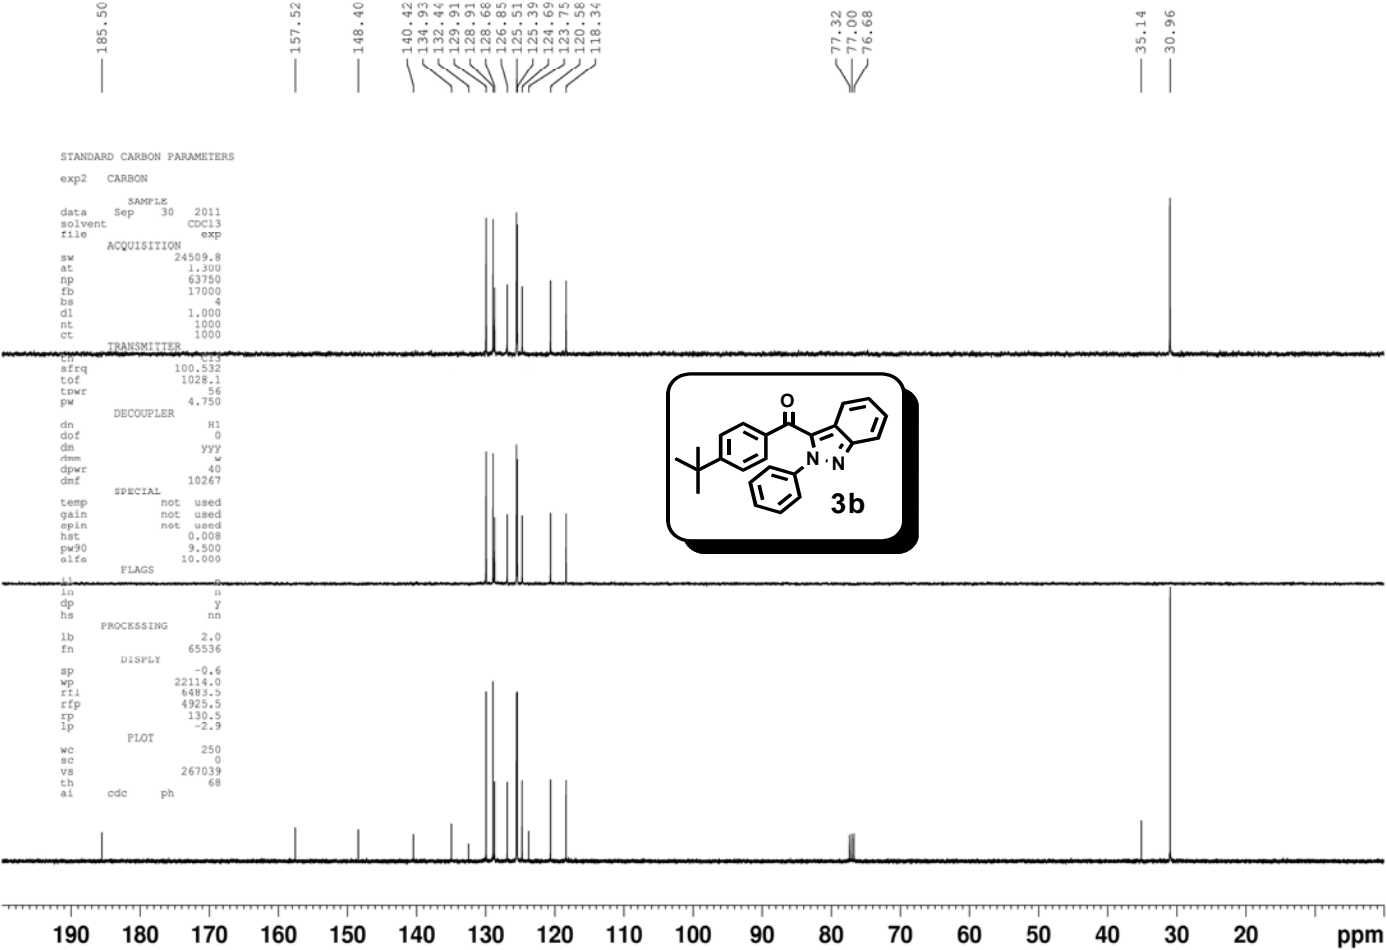

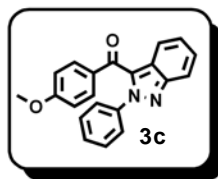

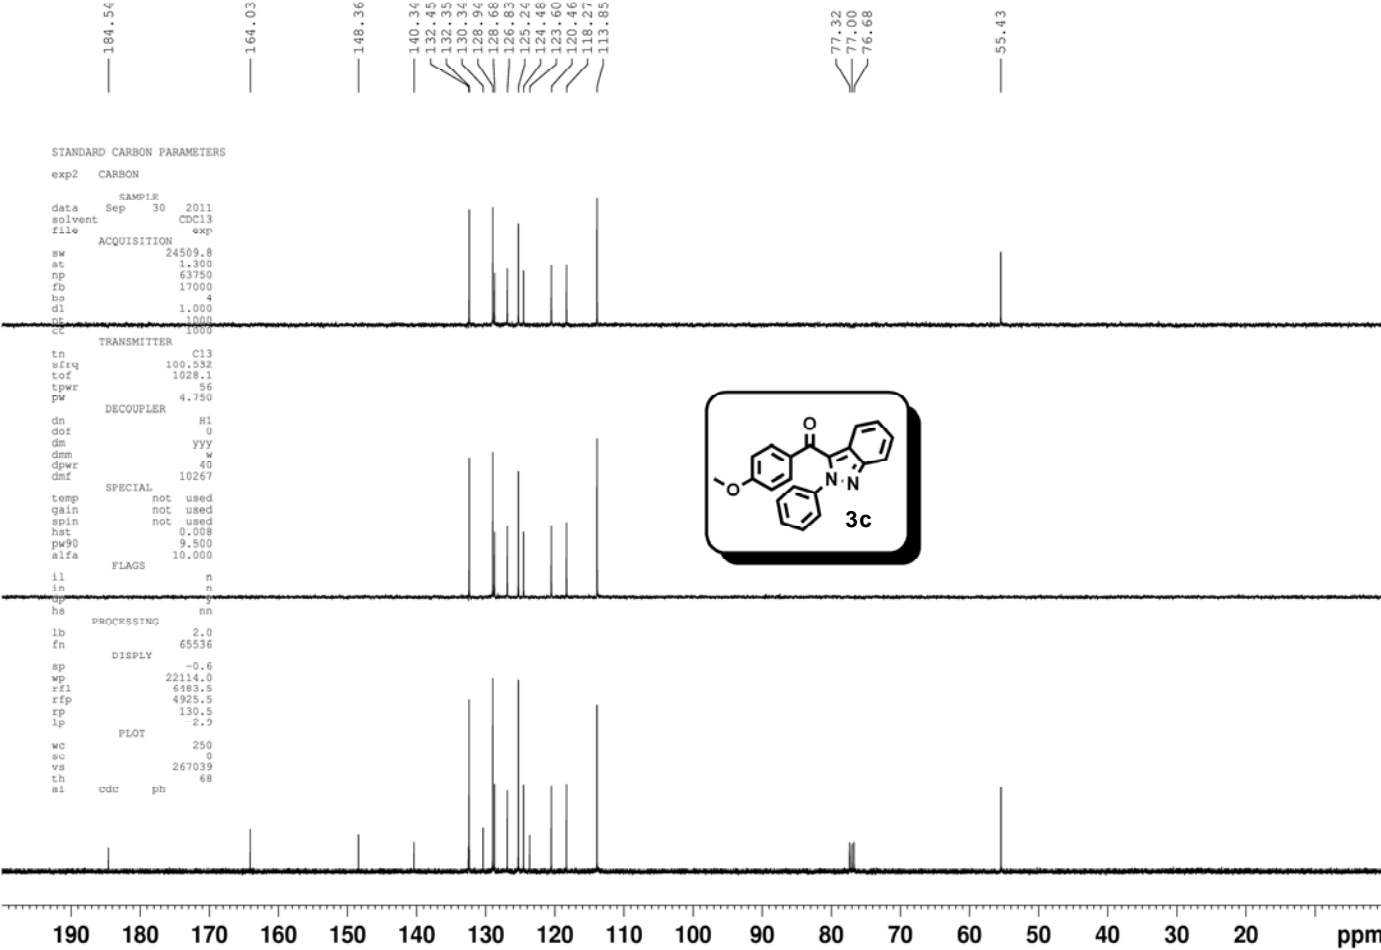

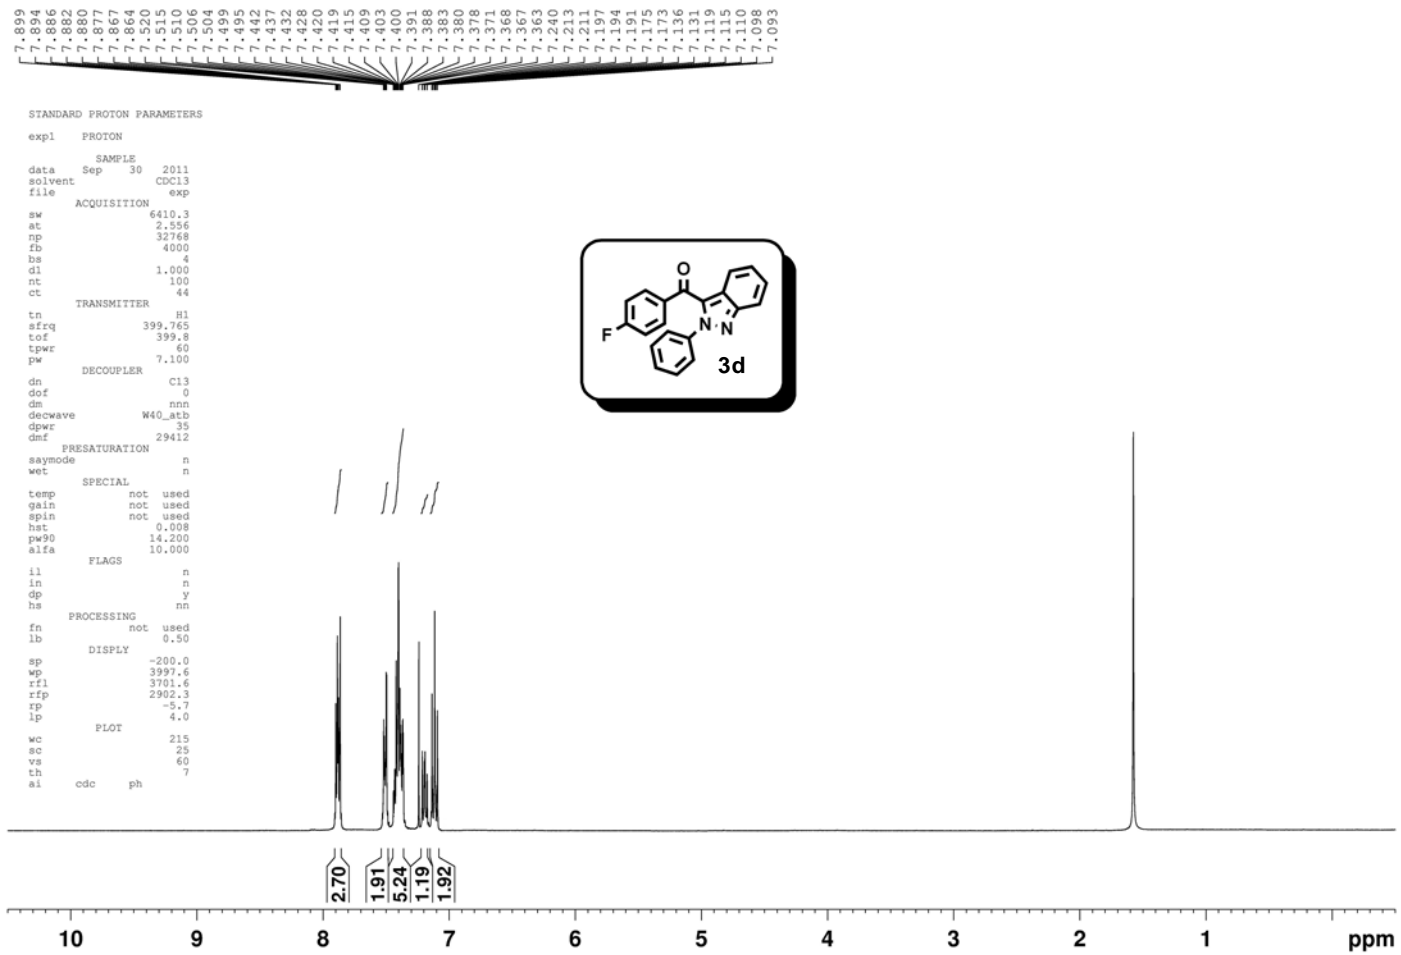

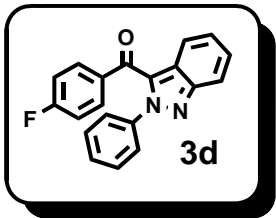



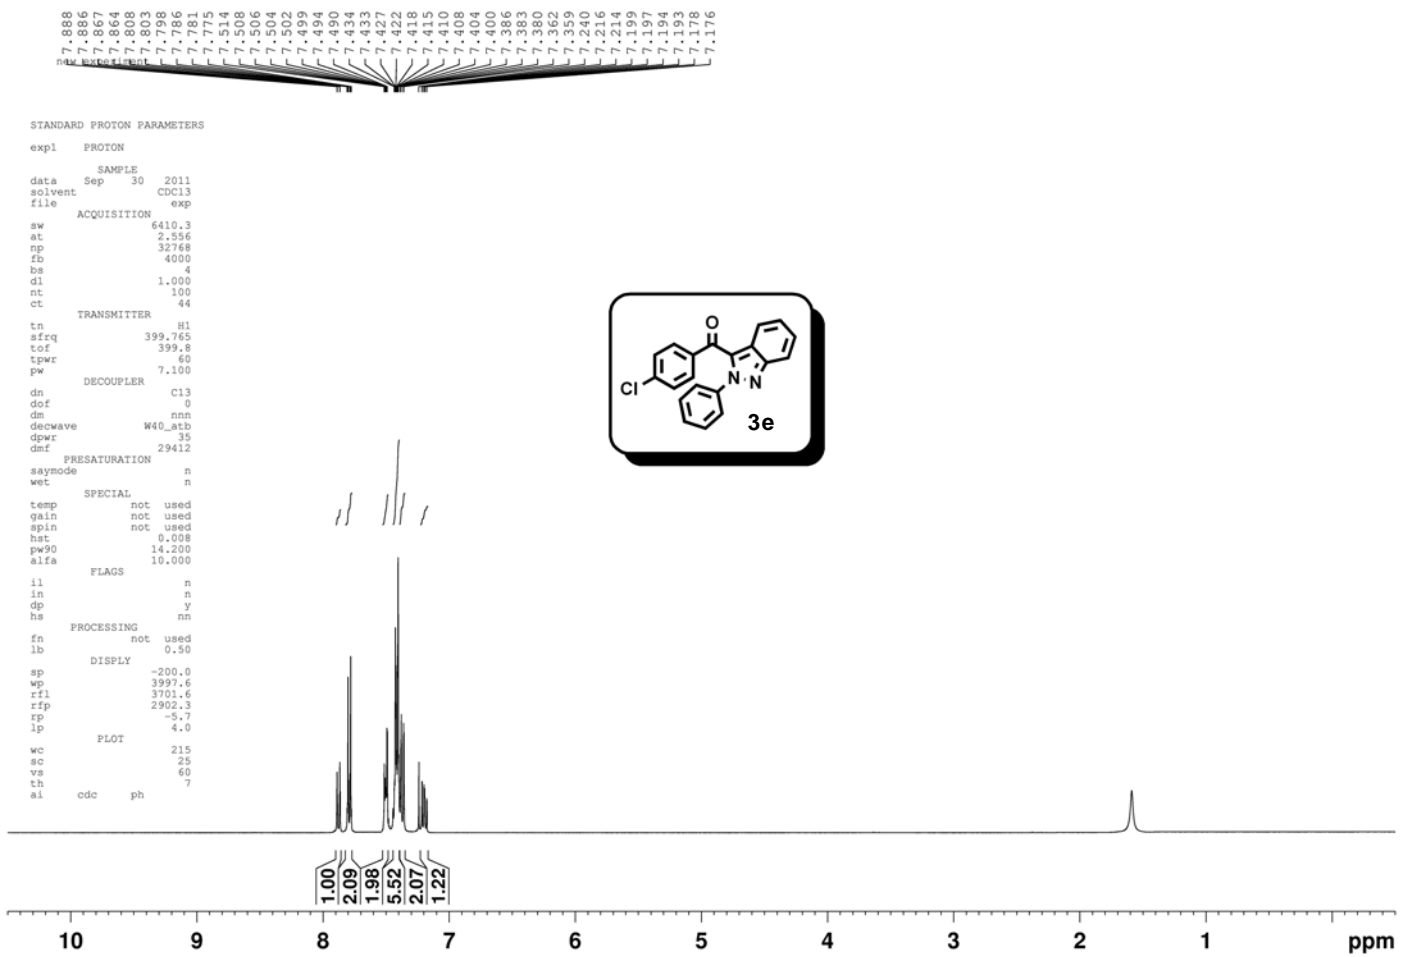

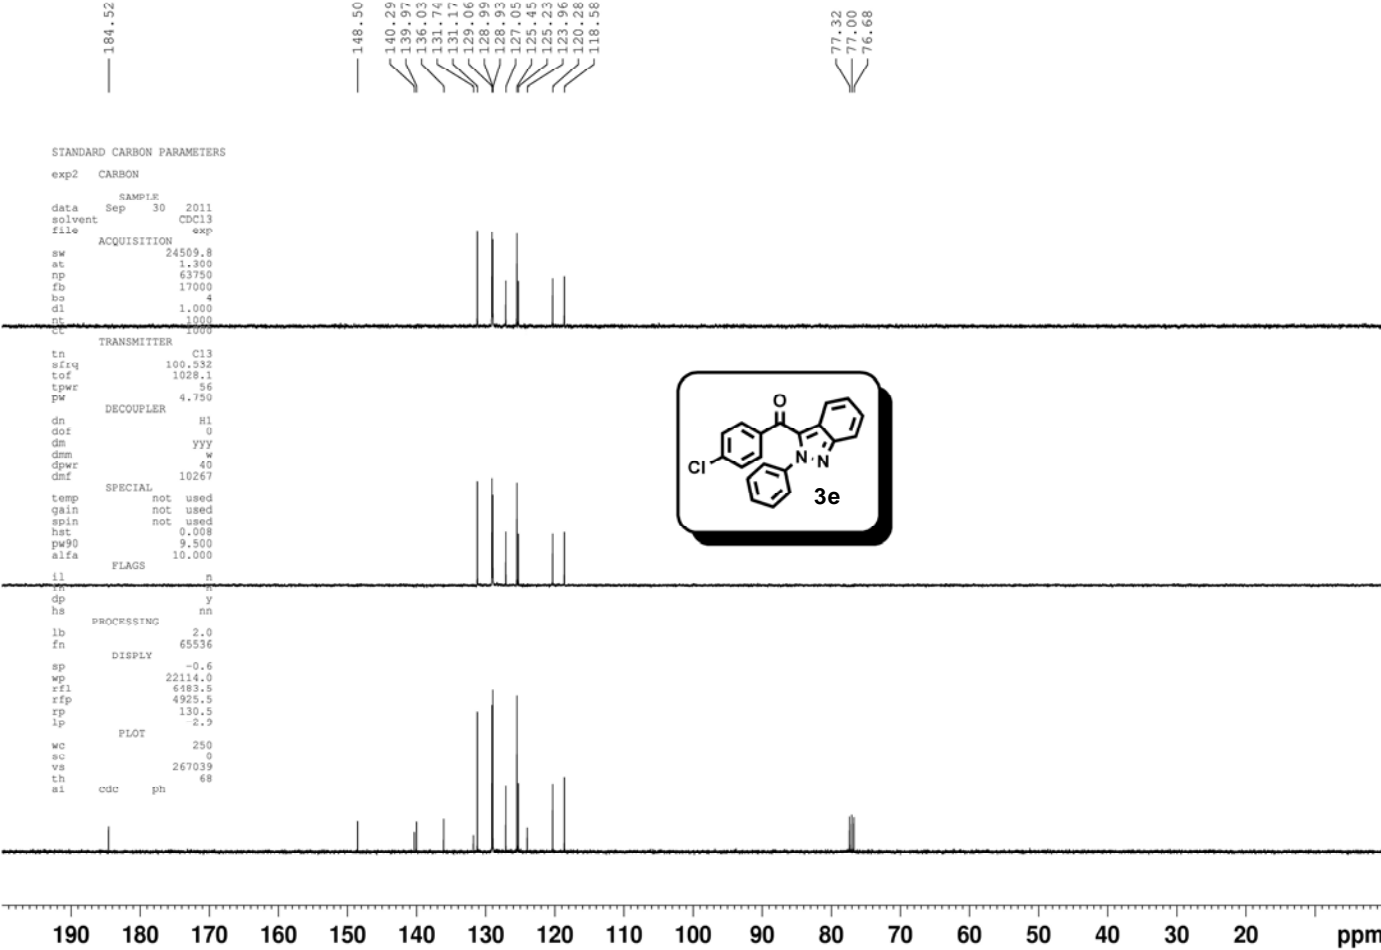

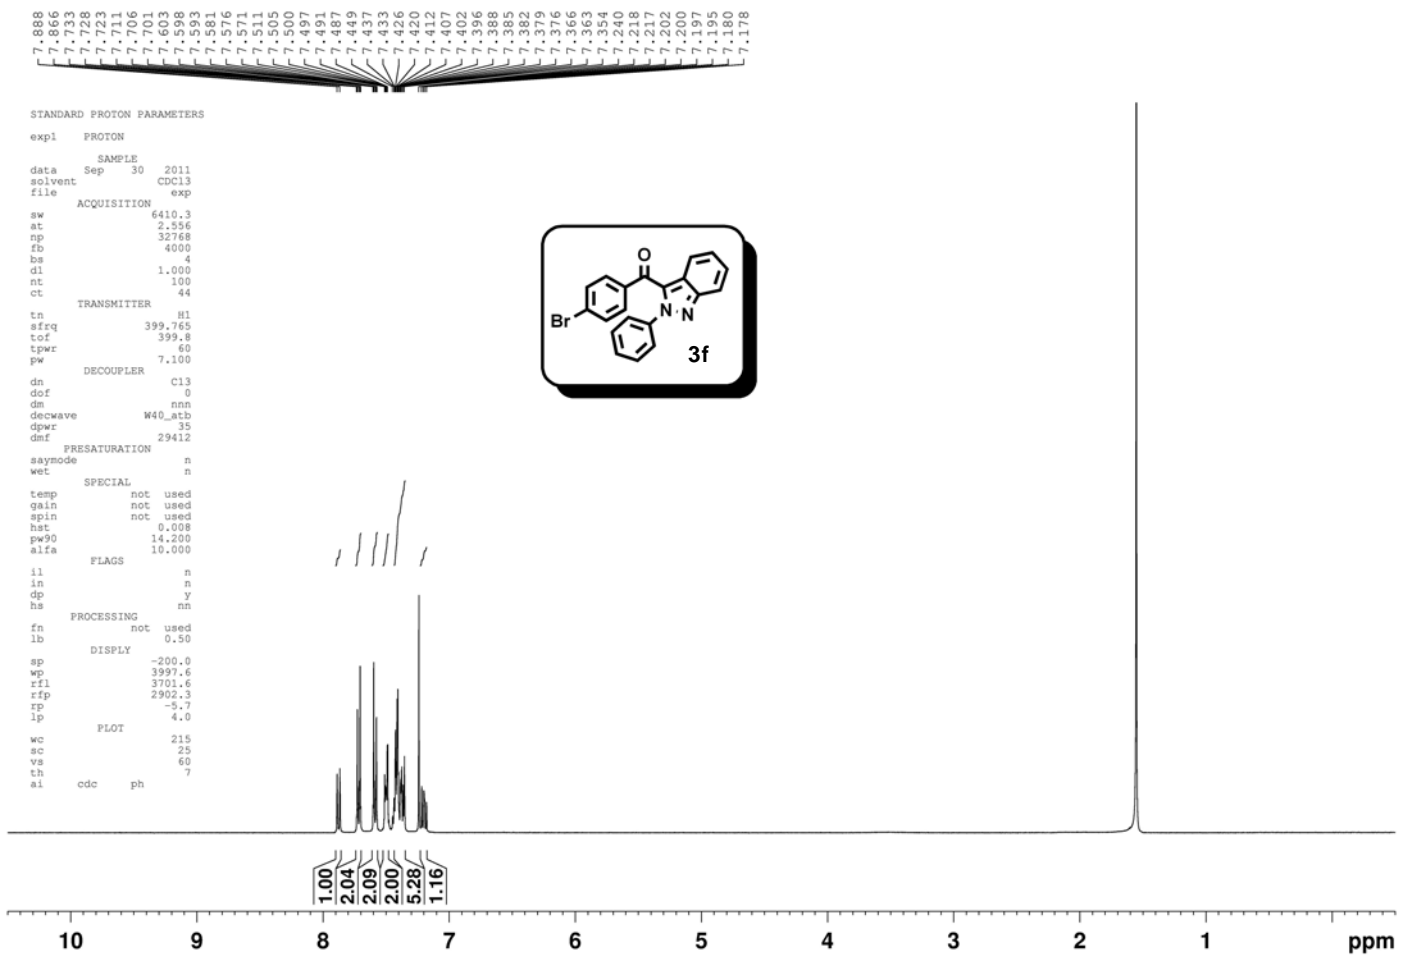

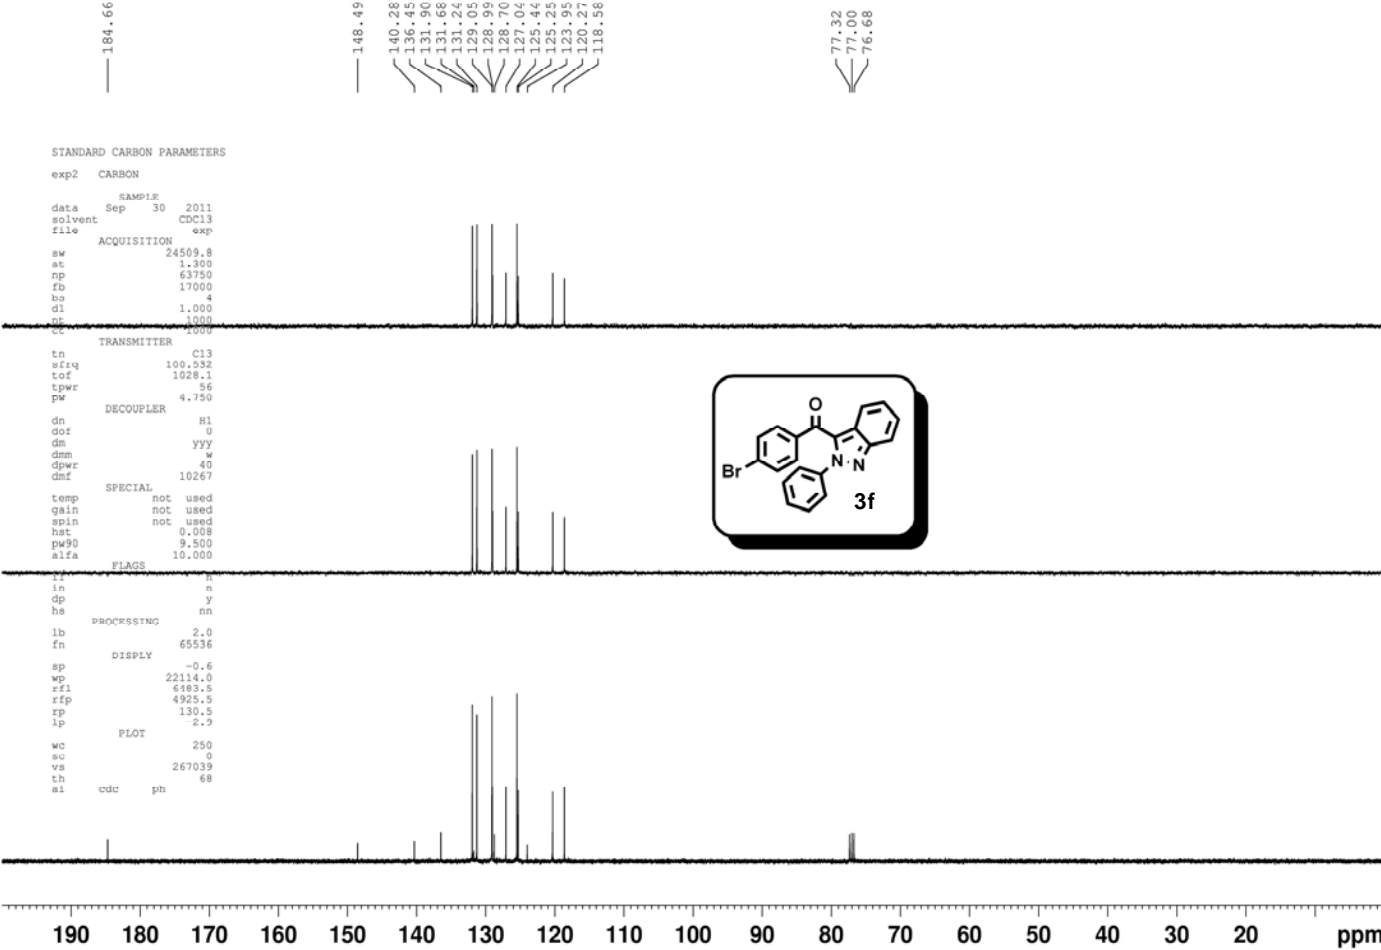

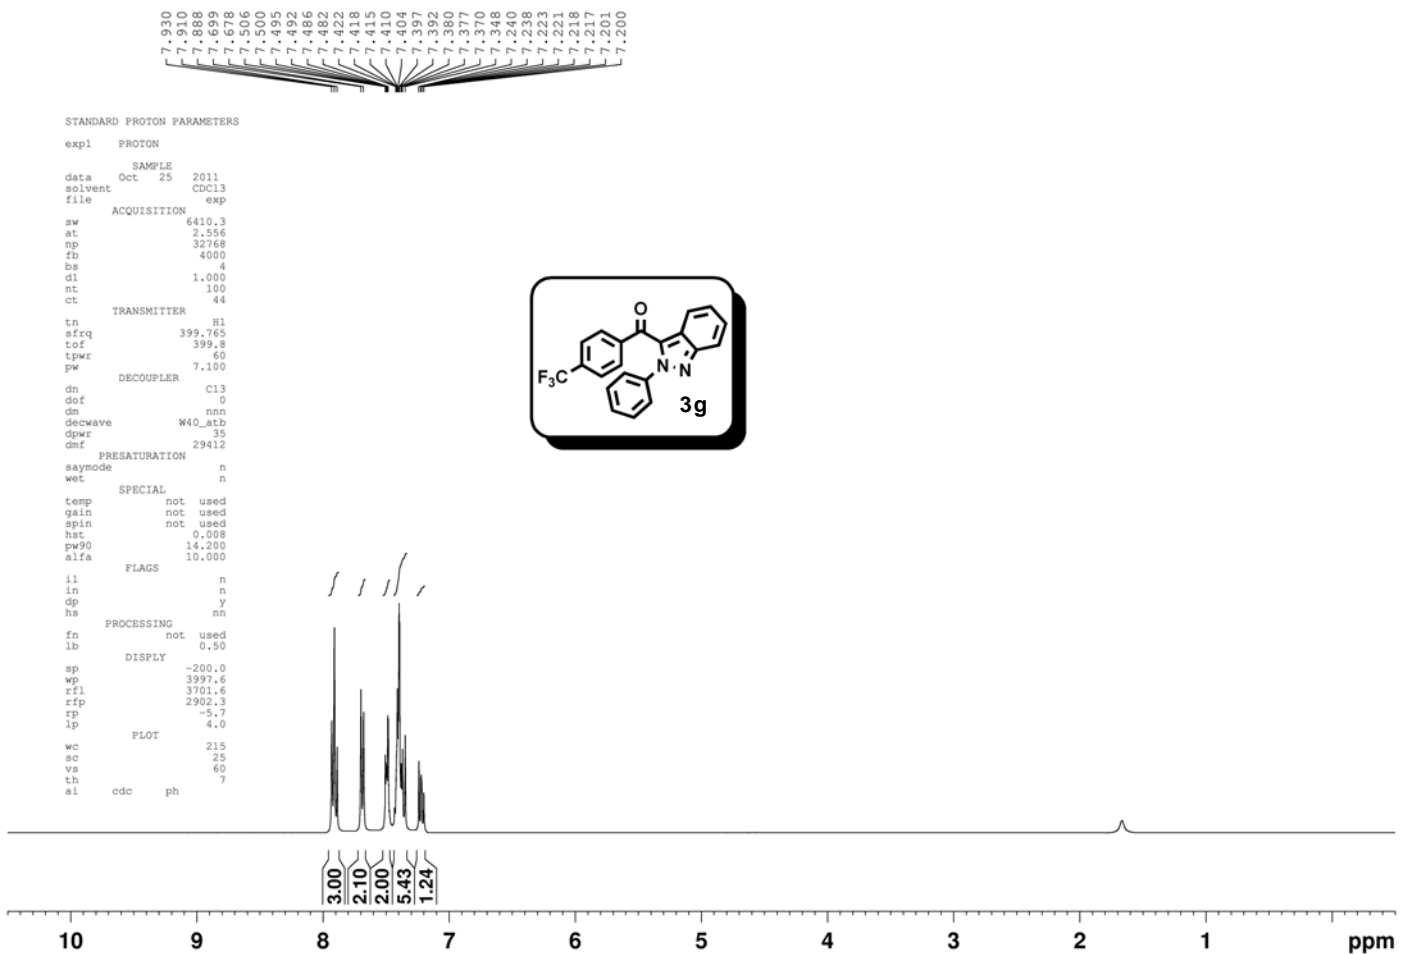

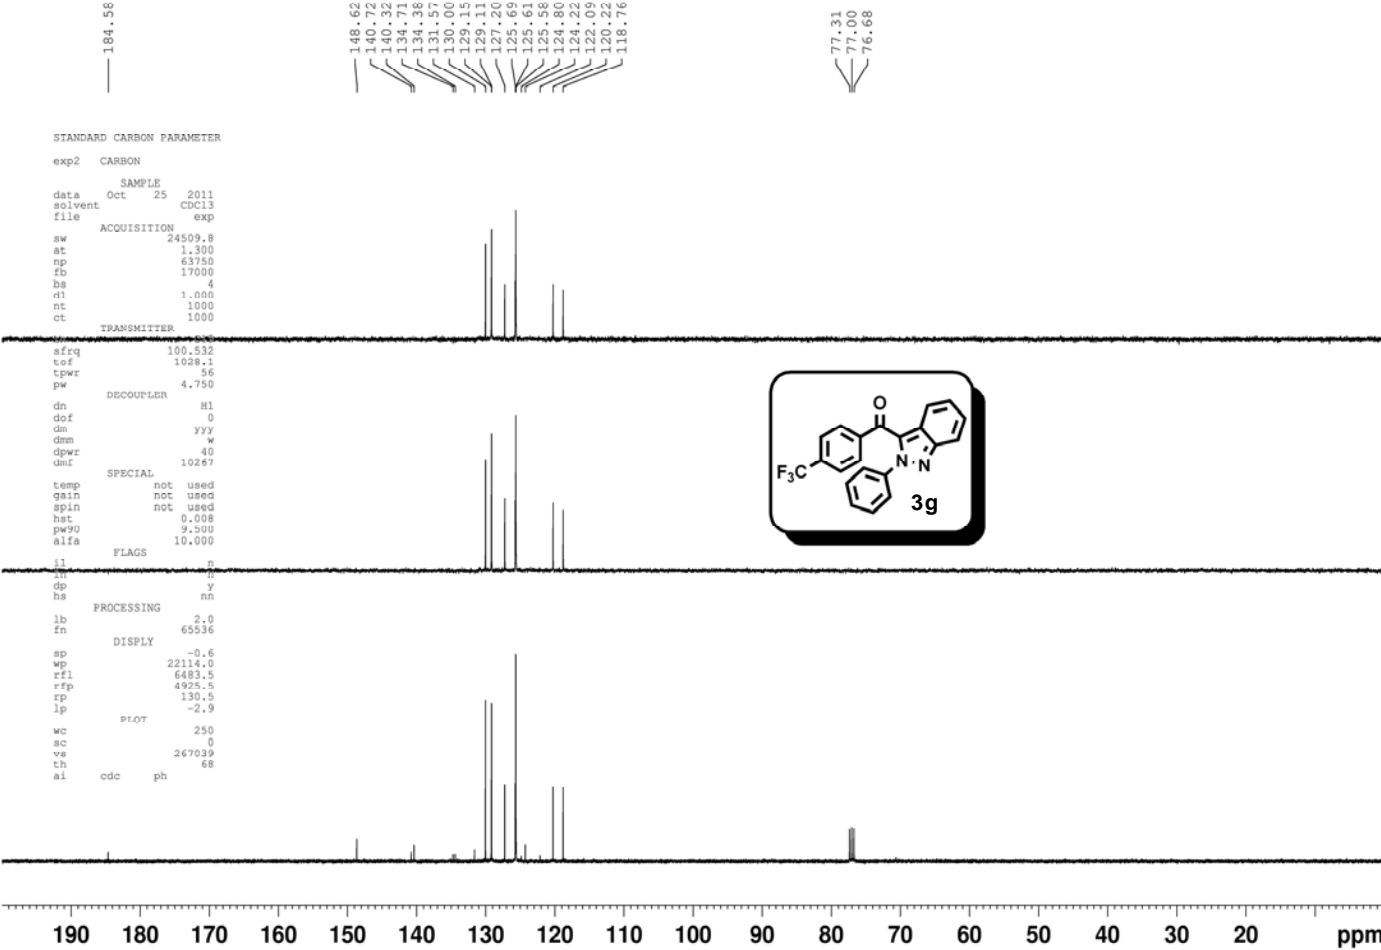

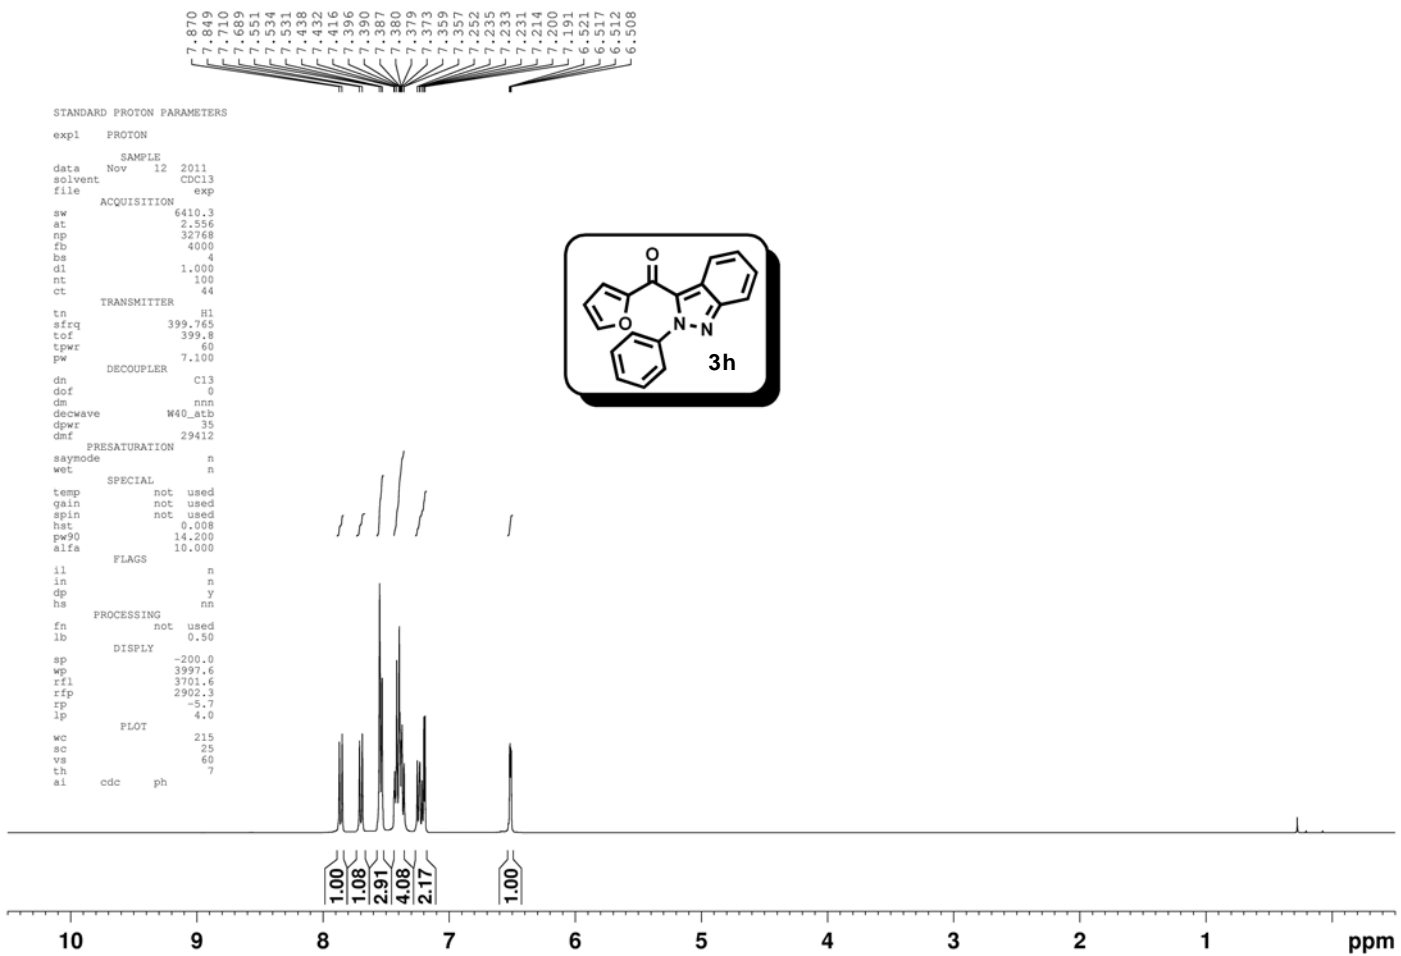

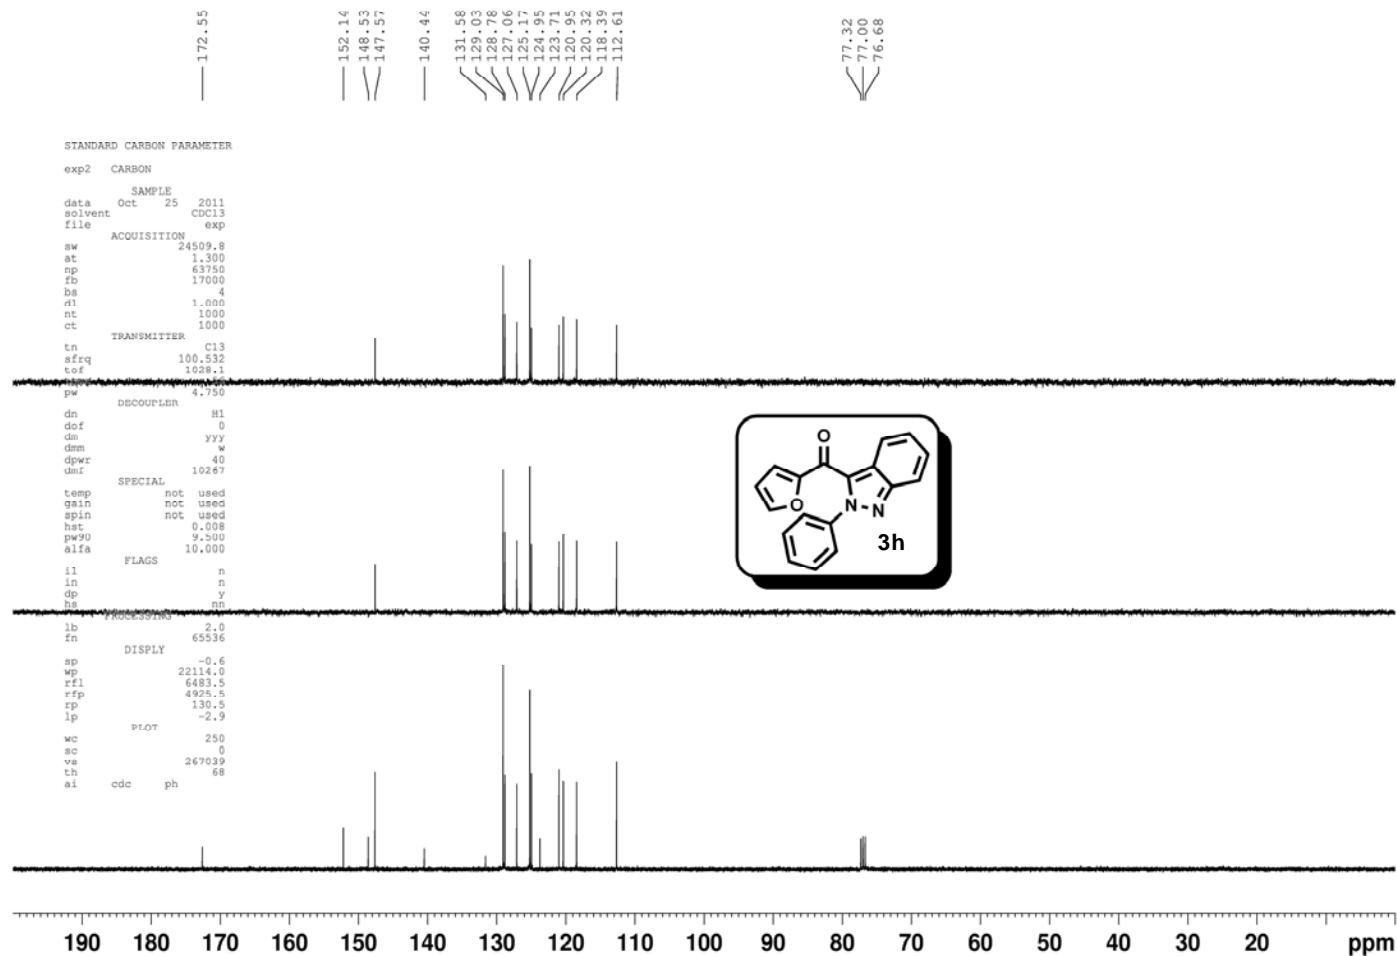



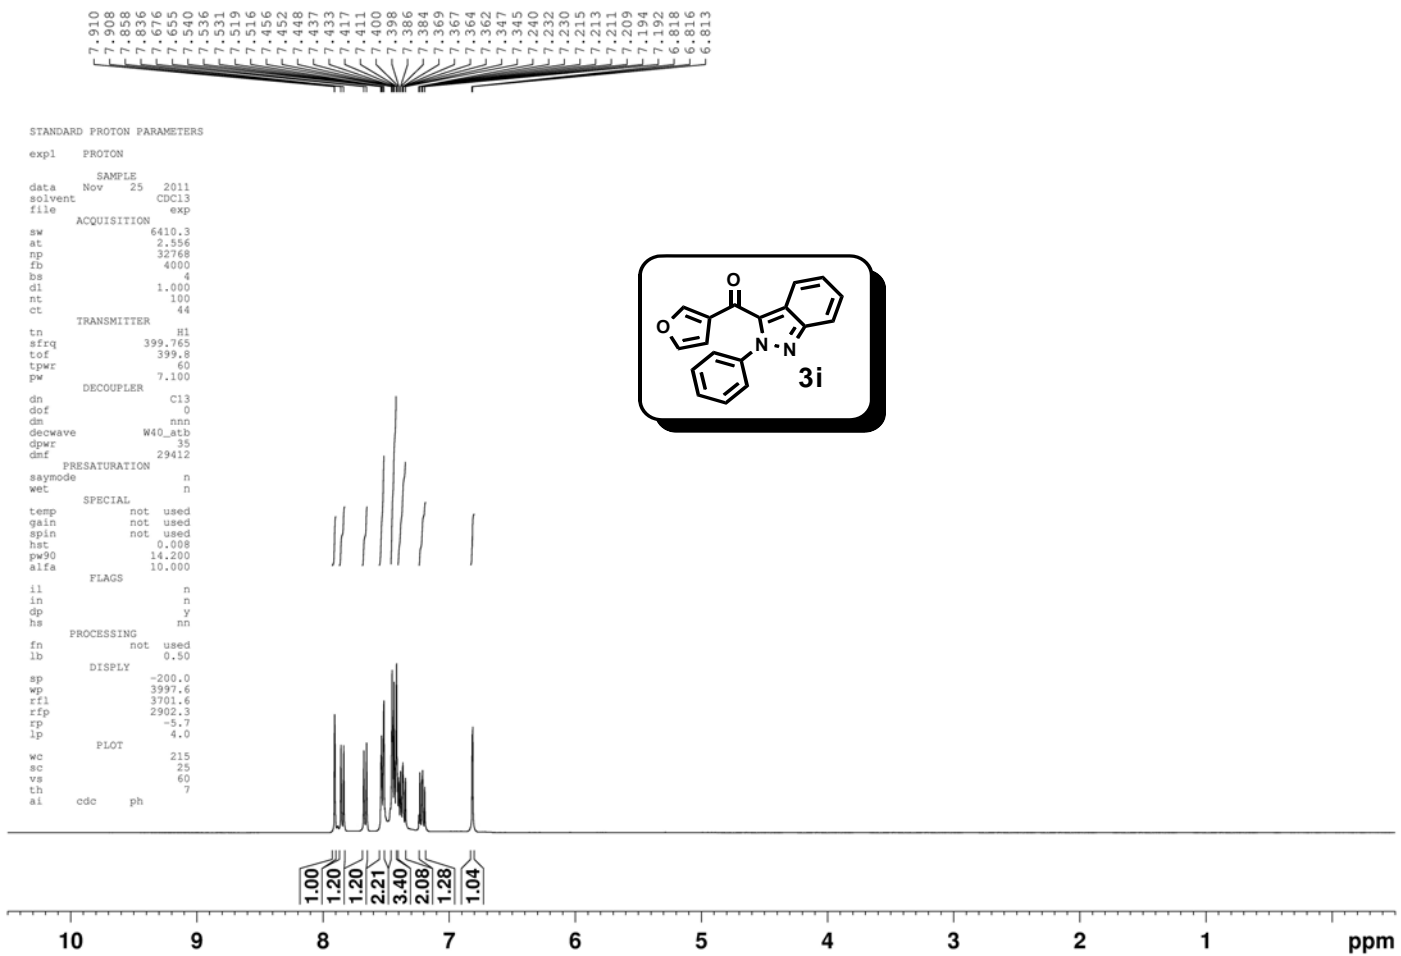

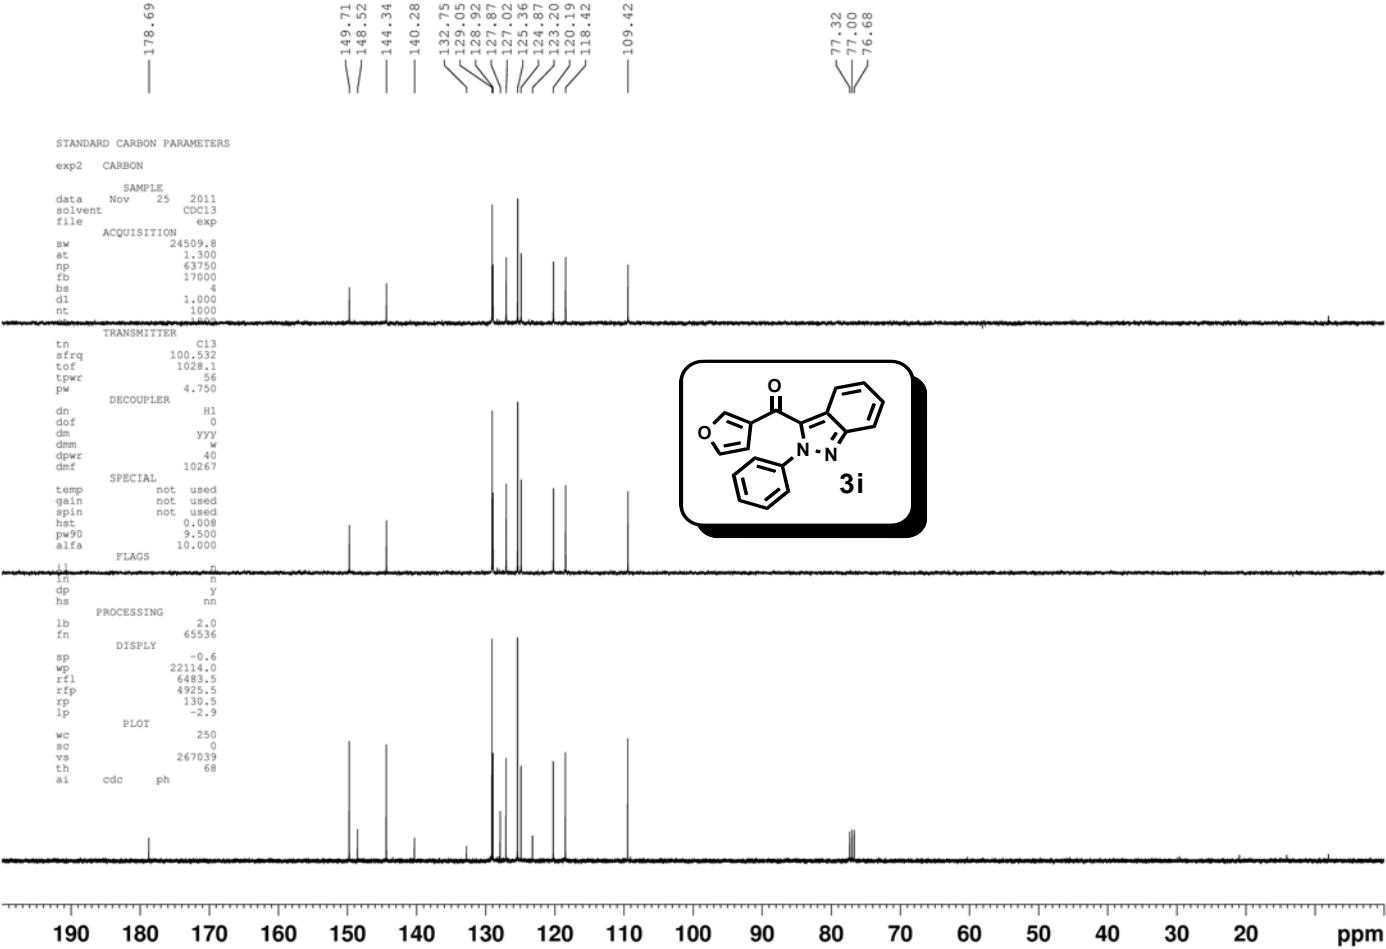

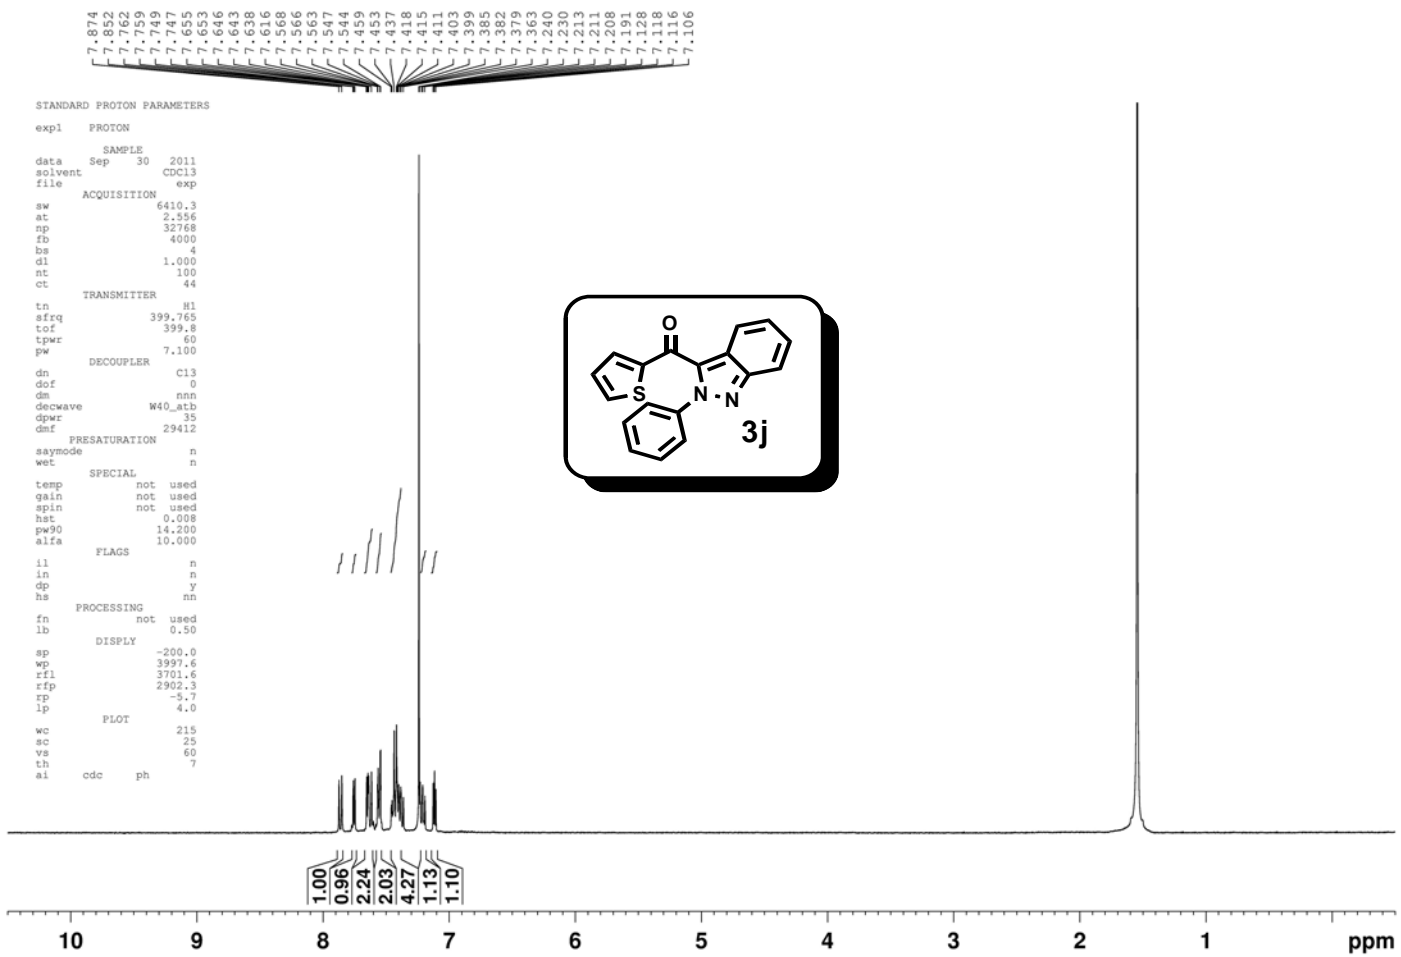

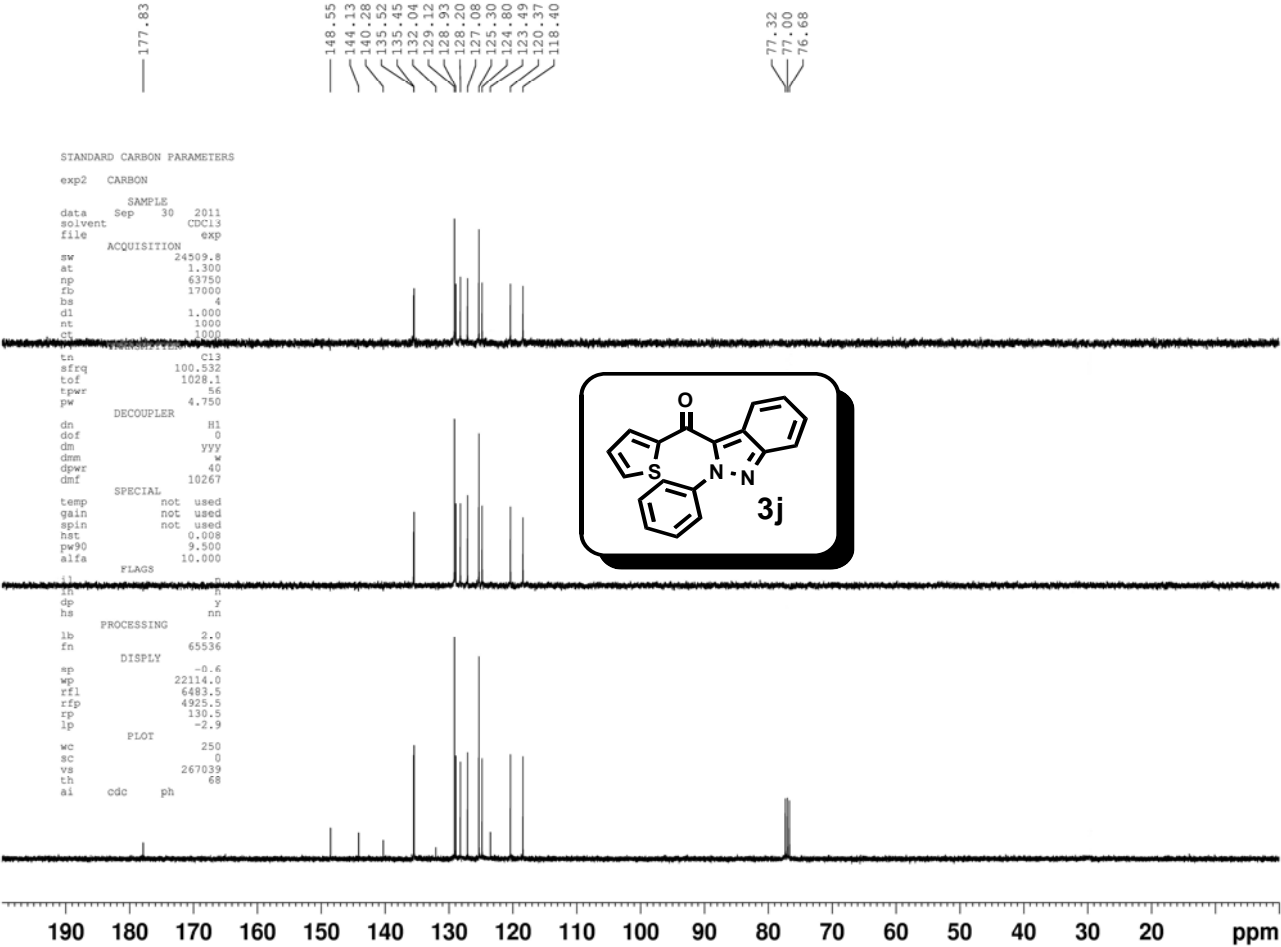

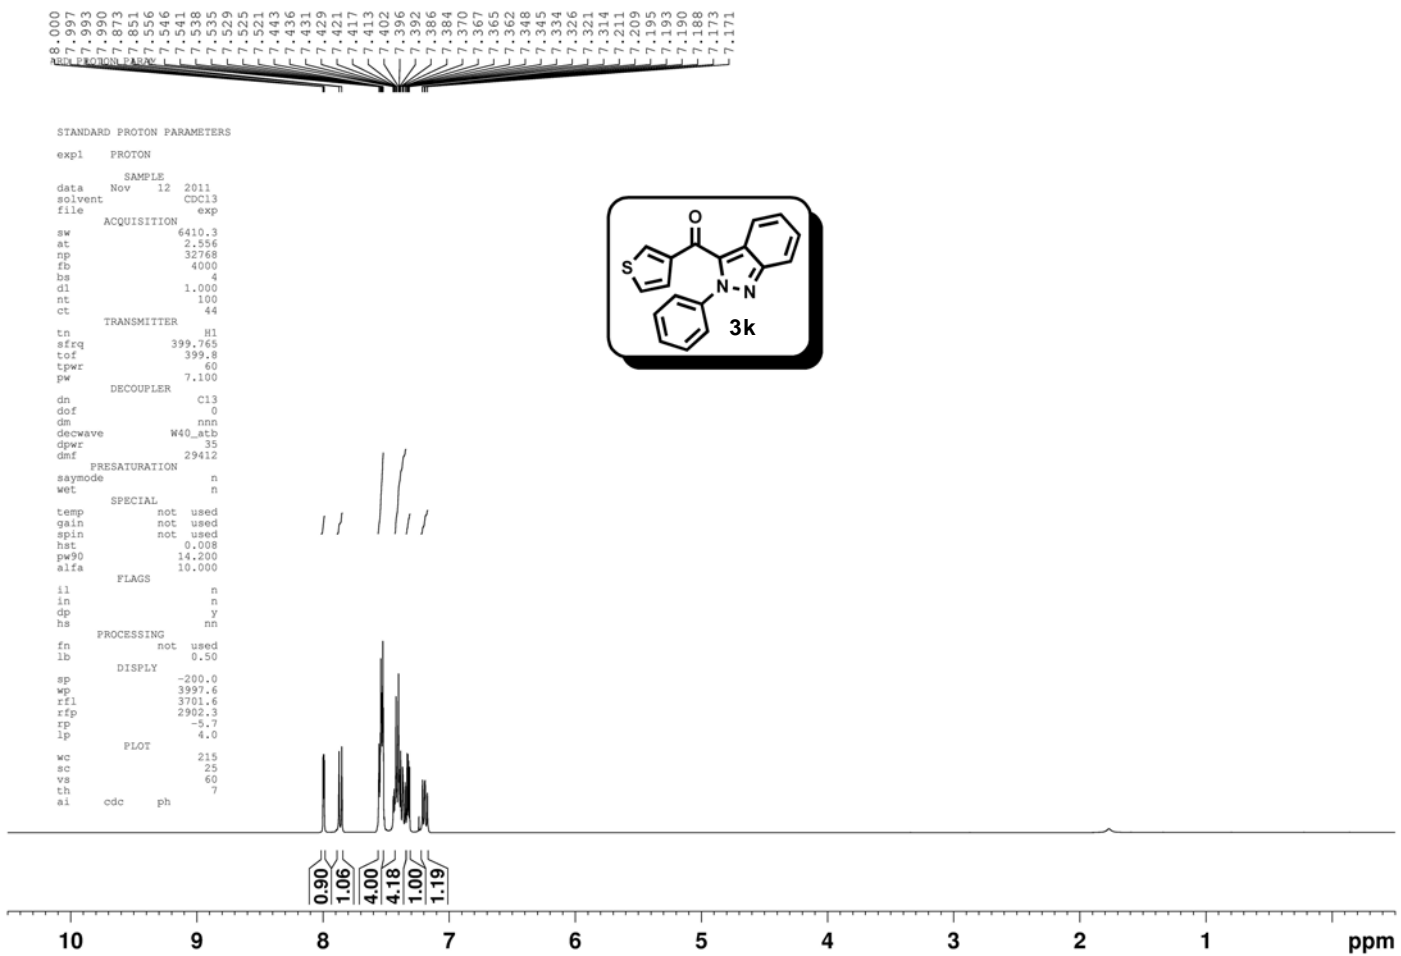

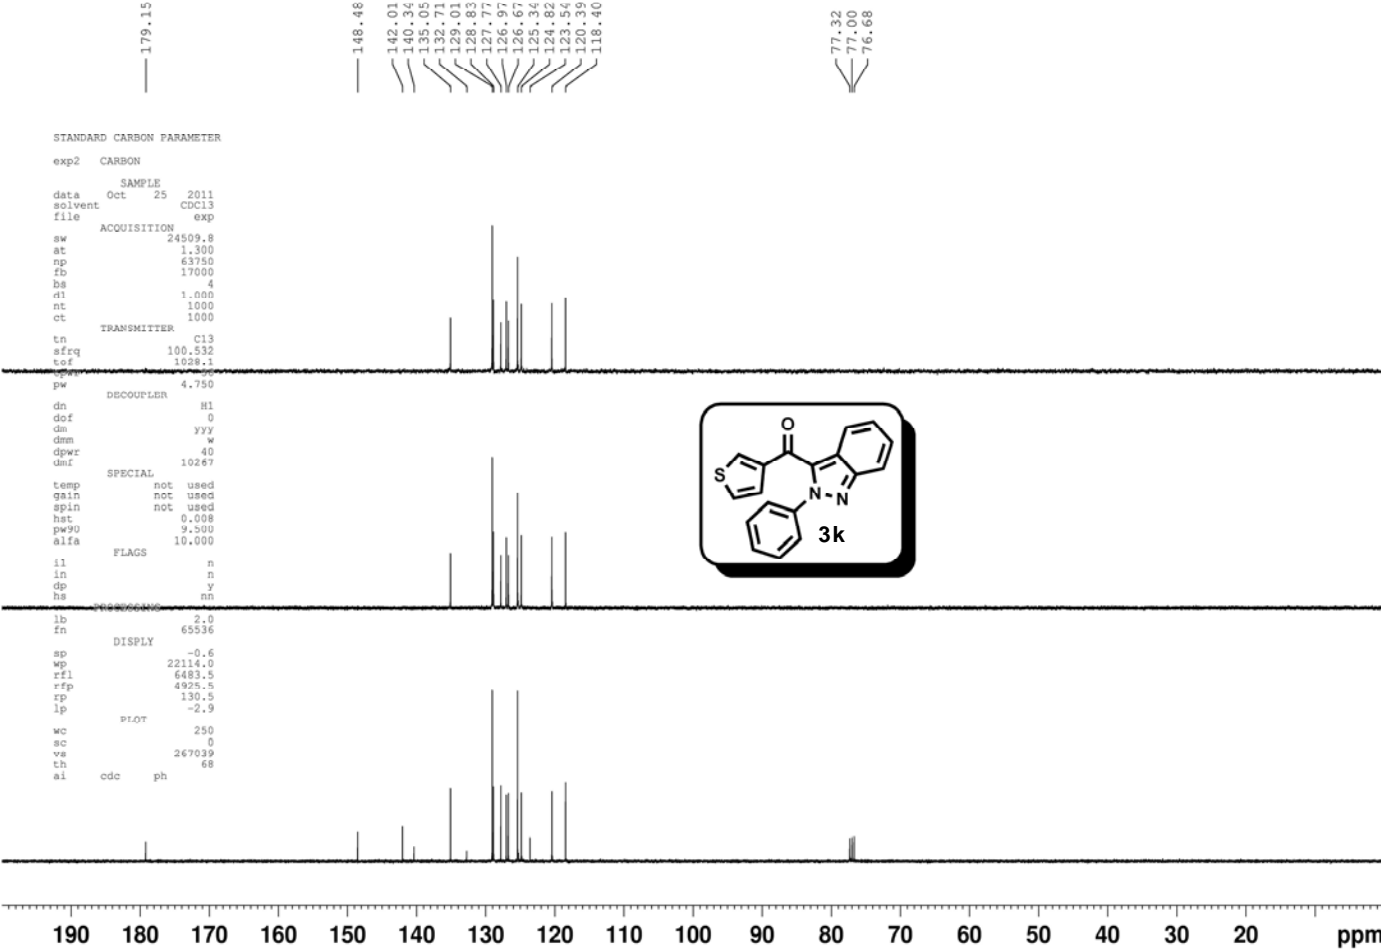

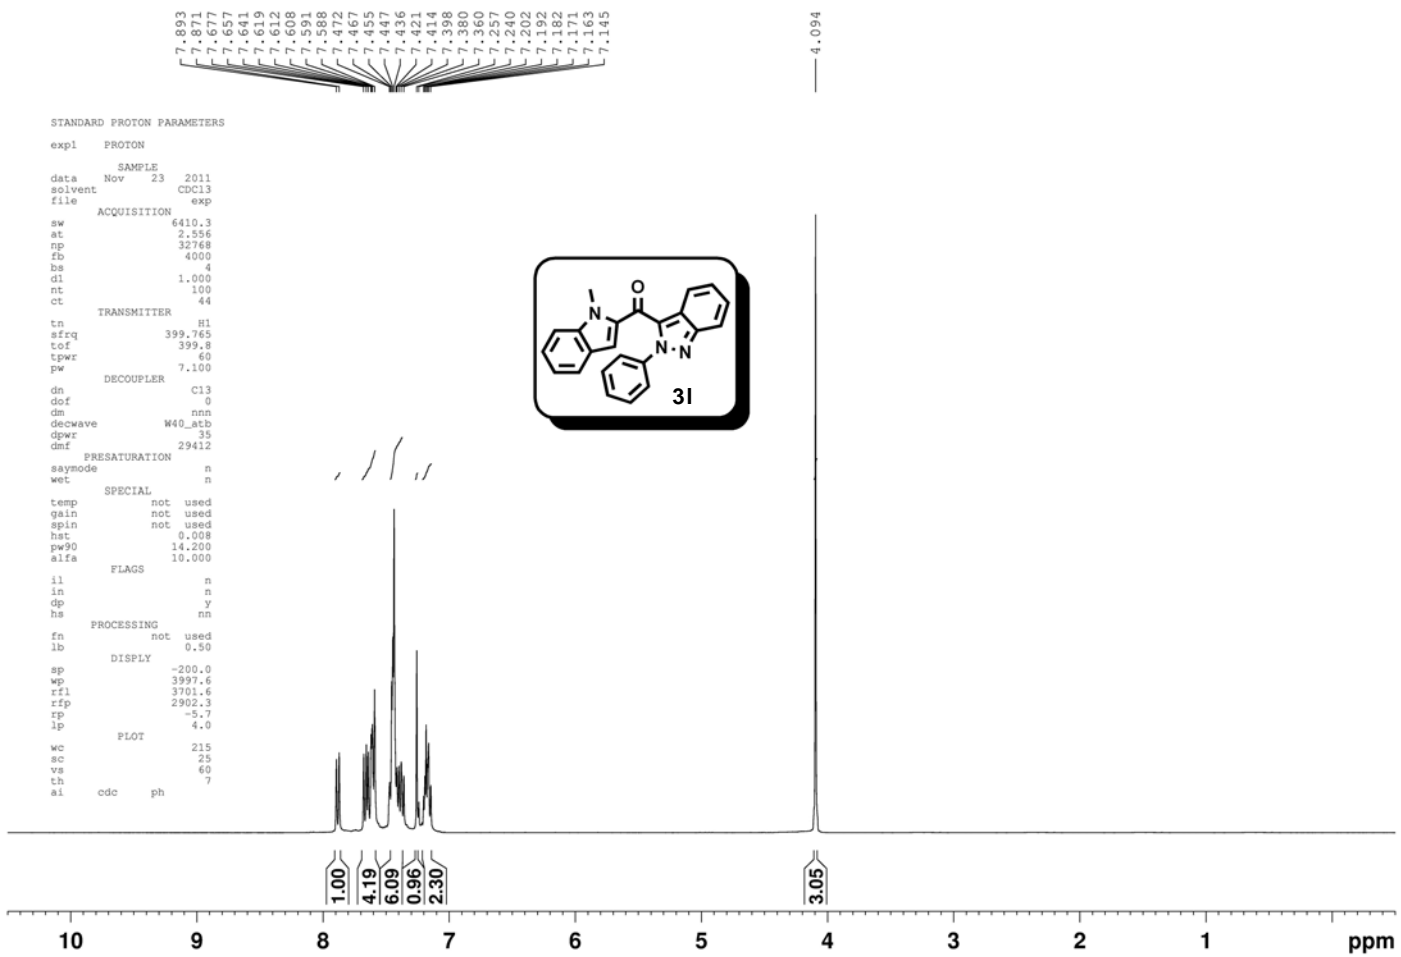

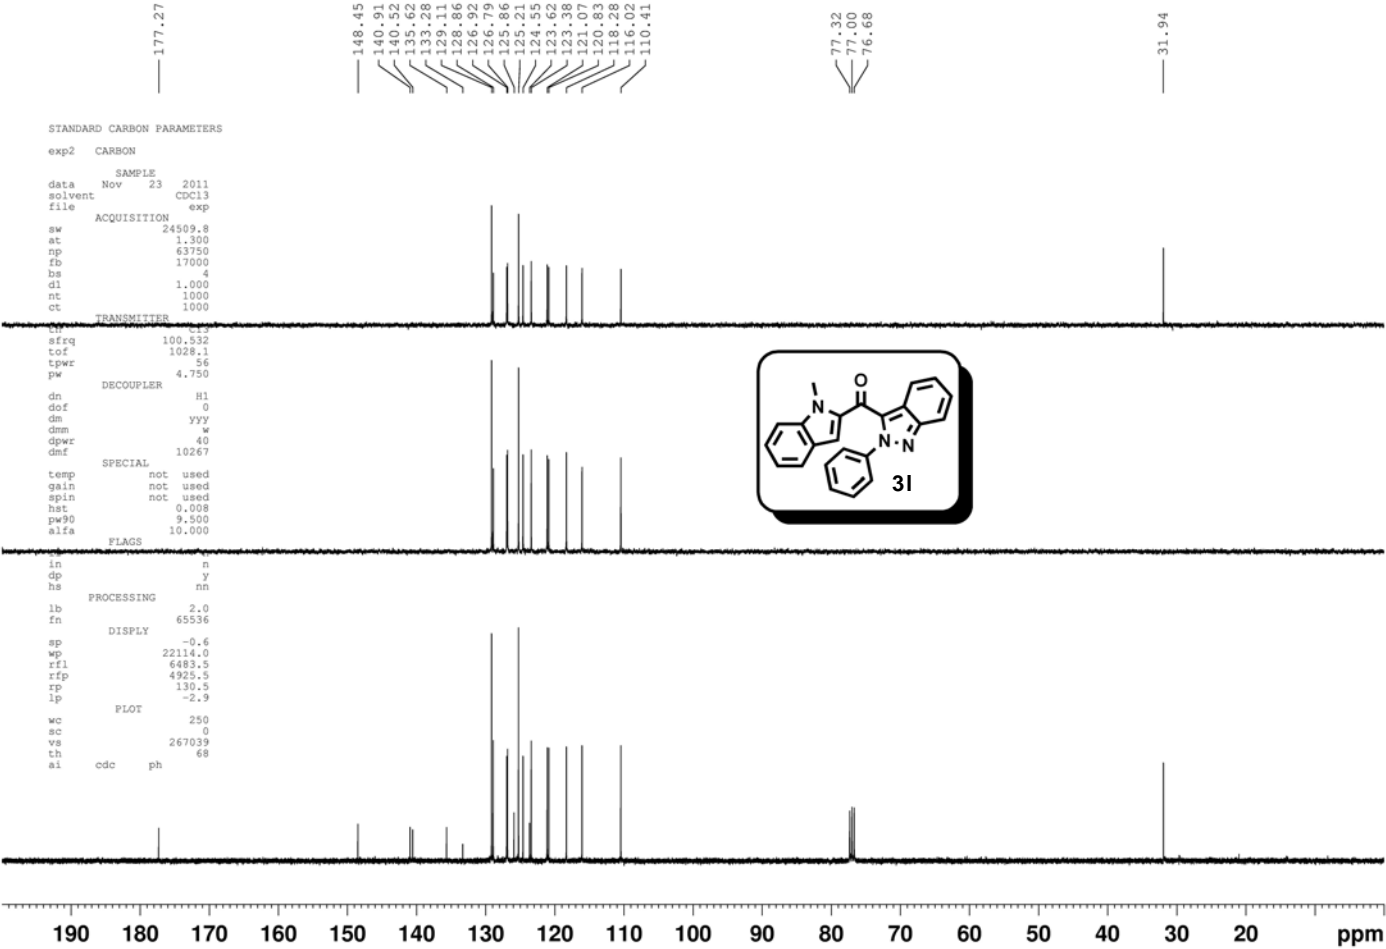



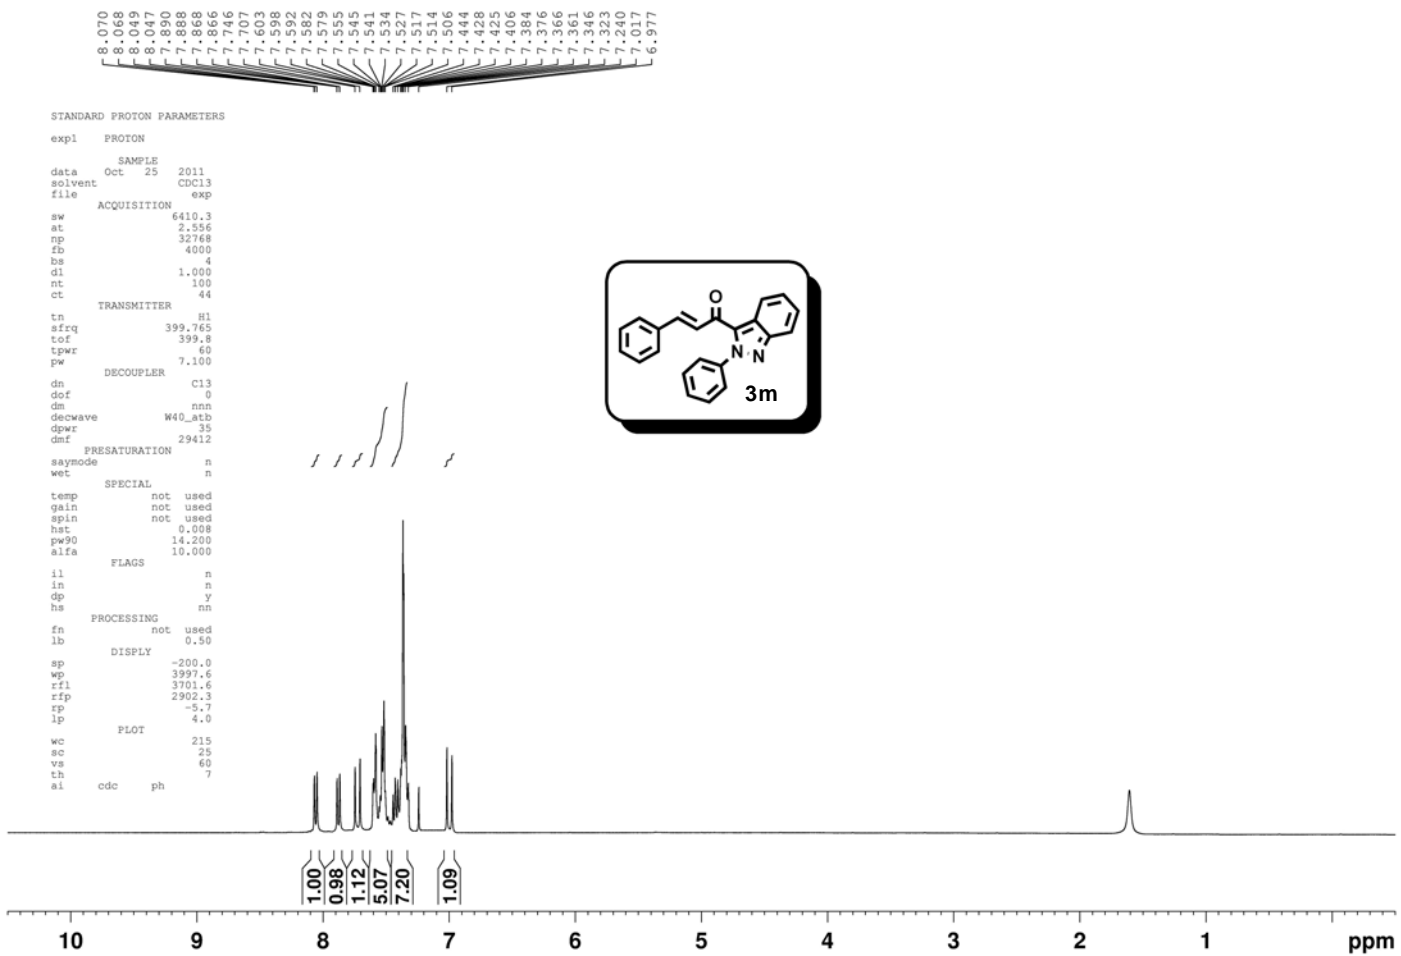

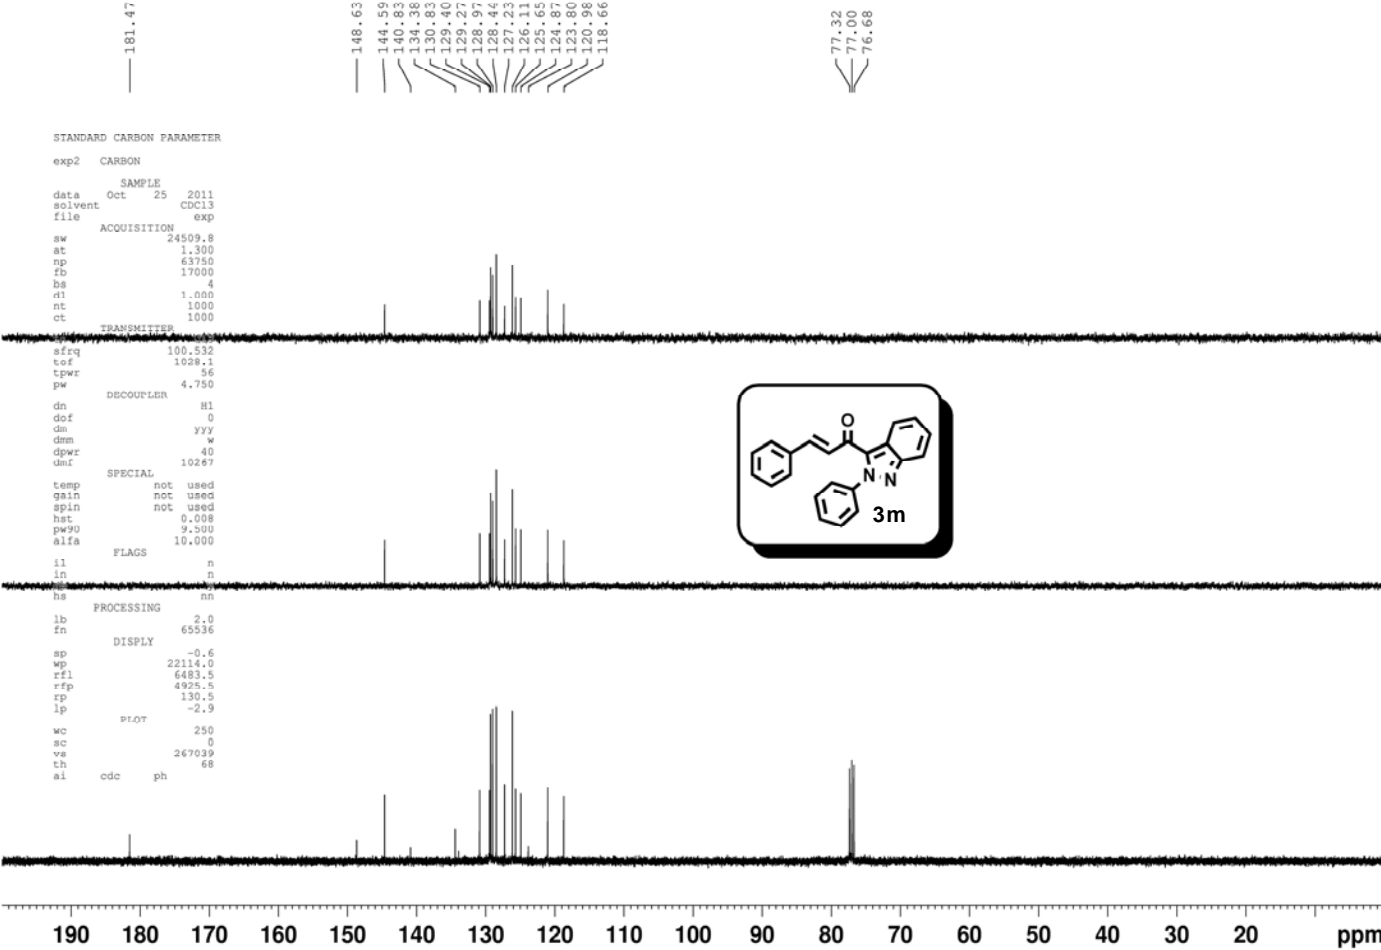

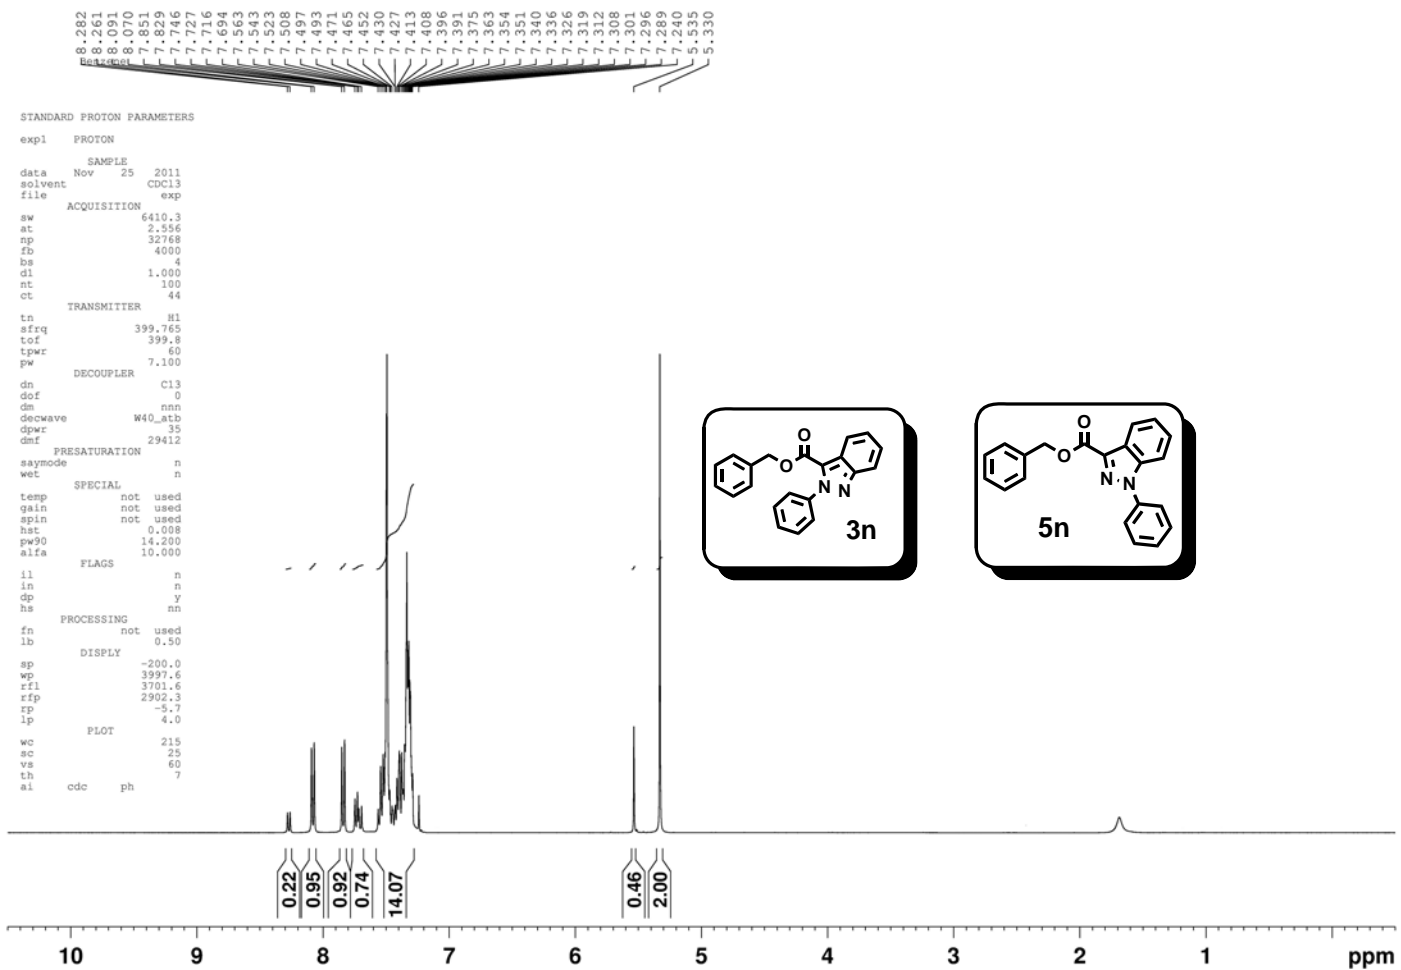

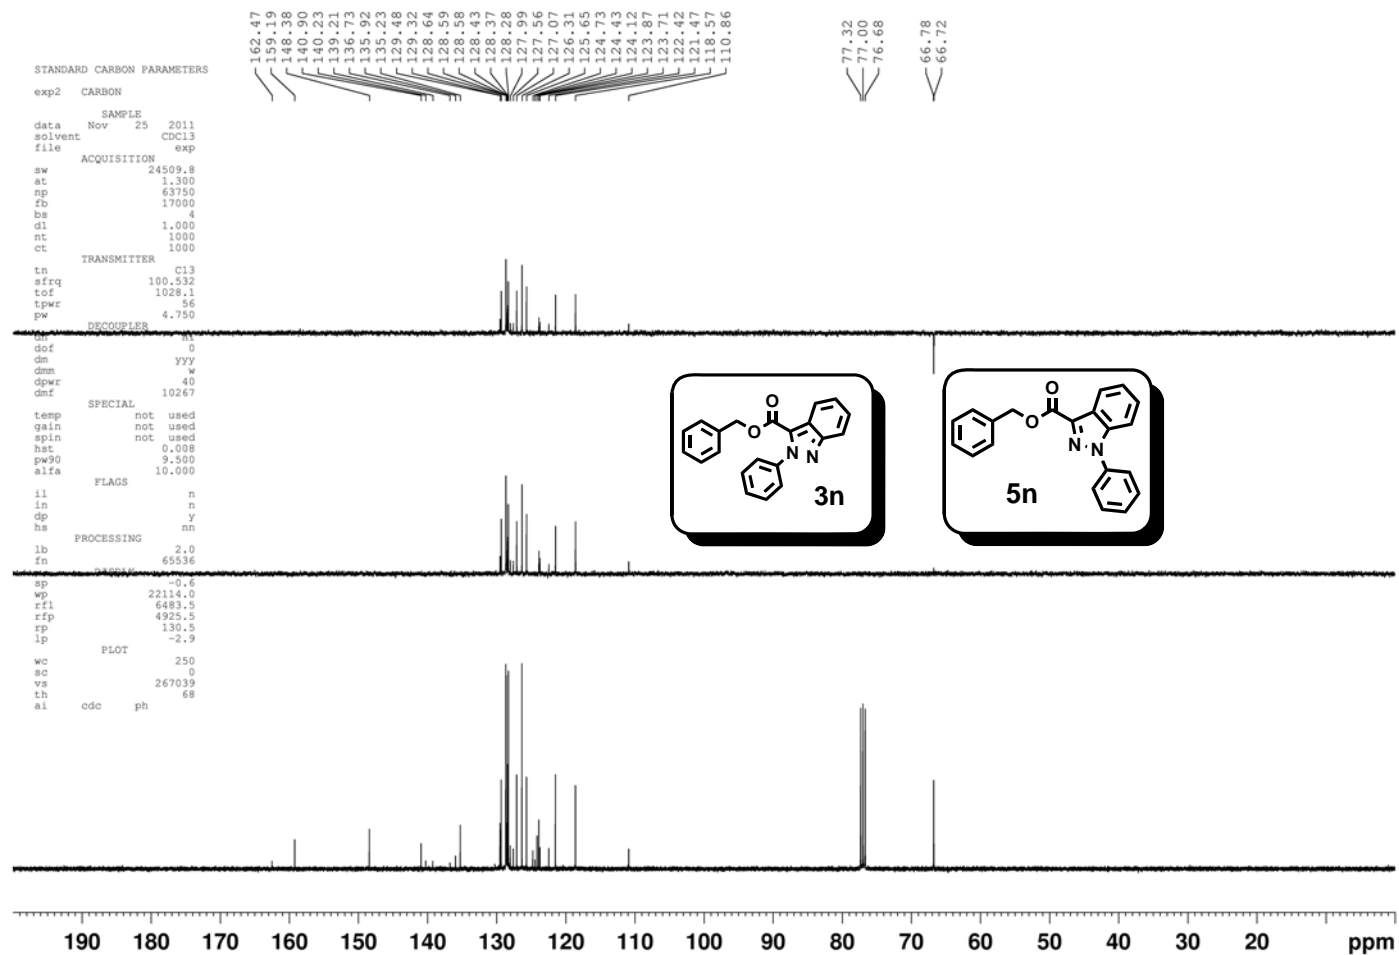

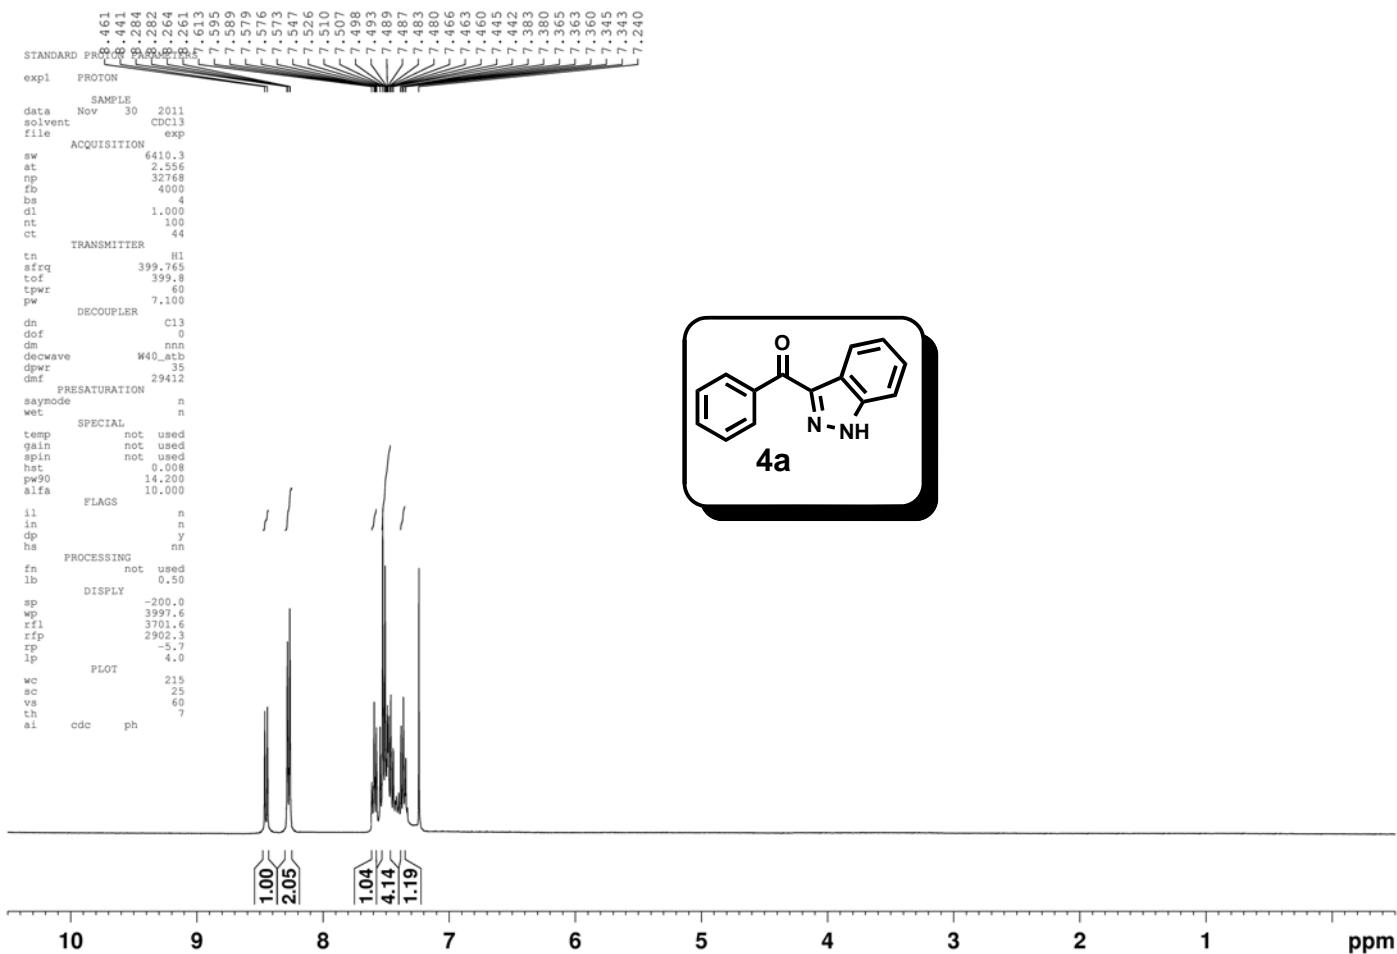

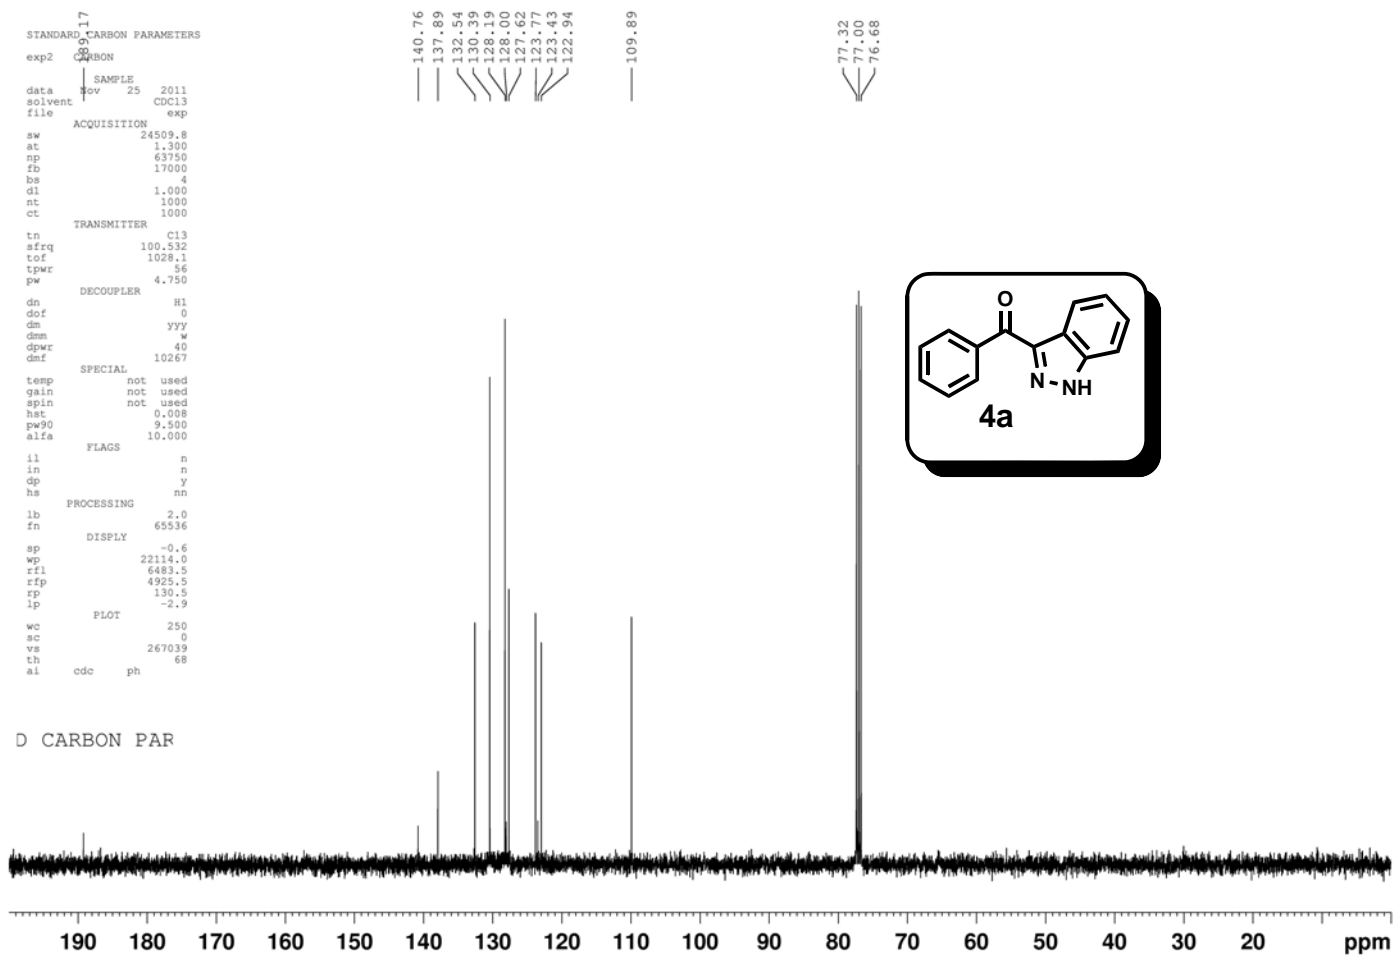

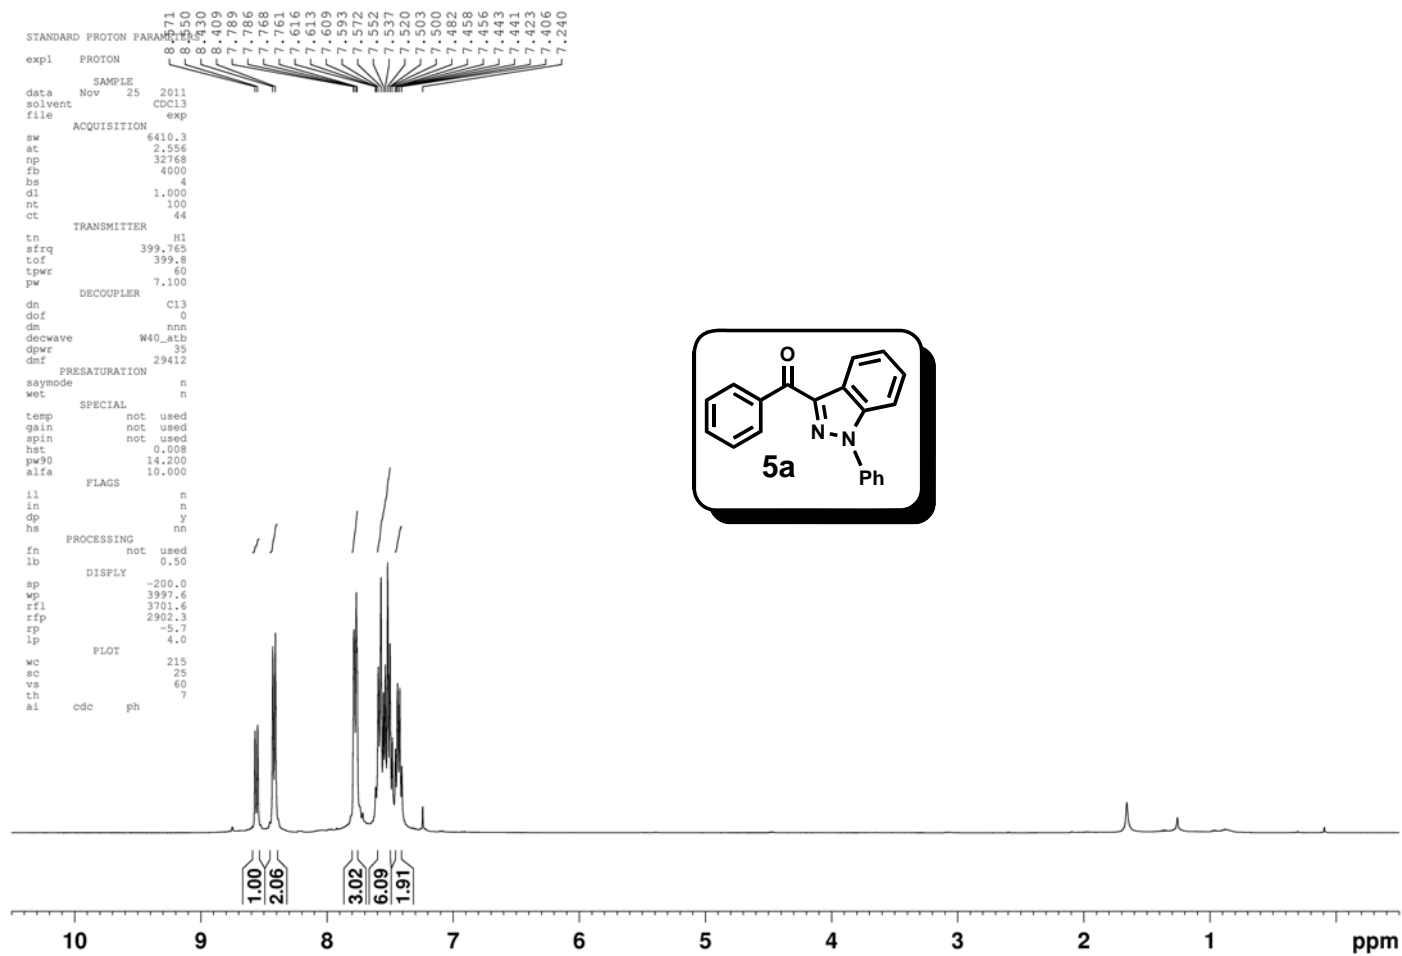

5a

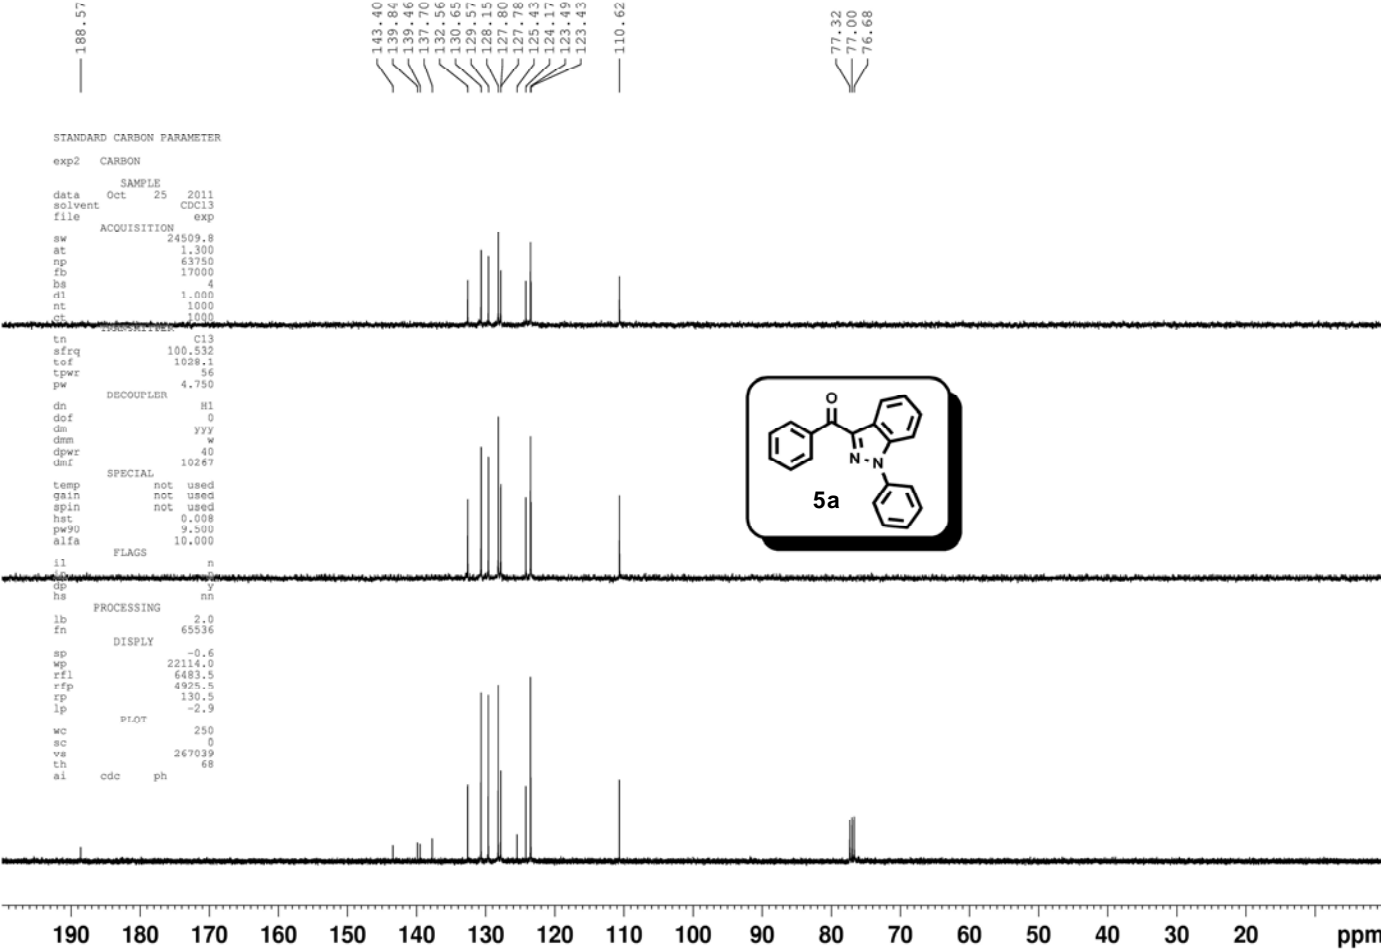





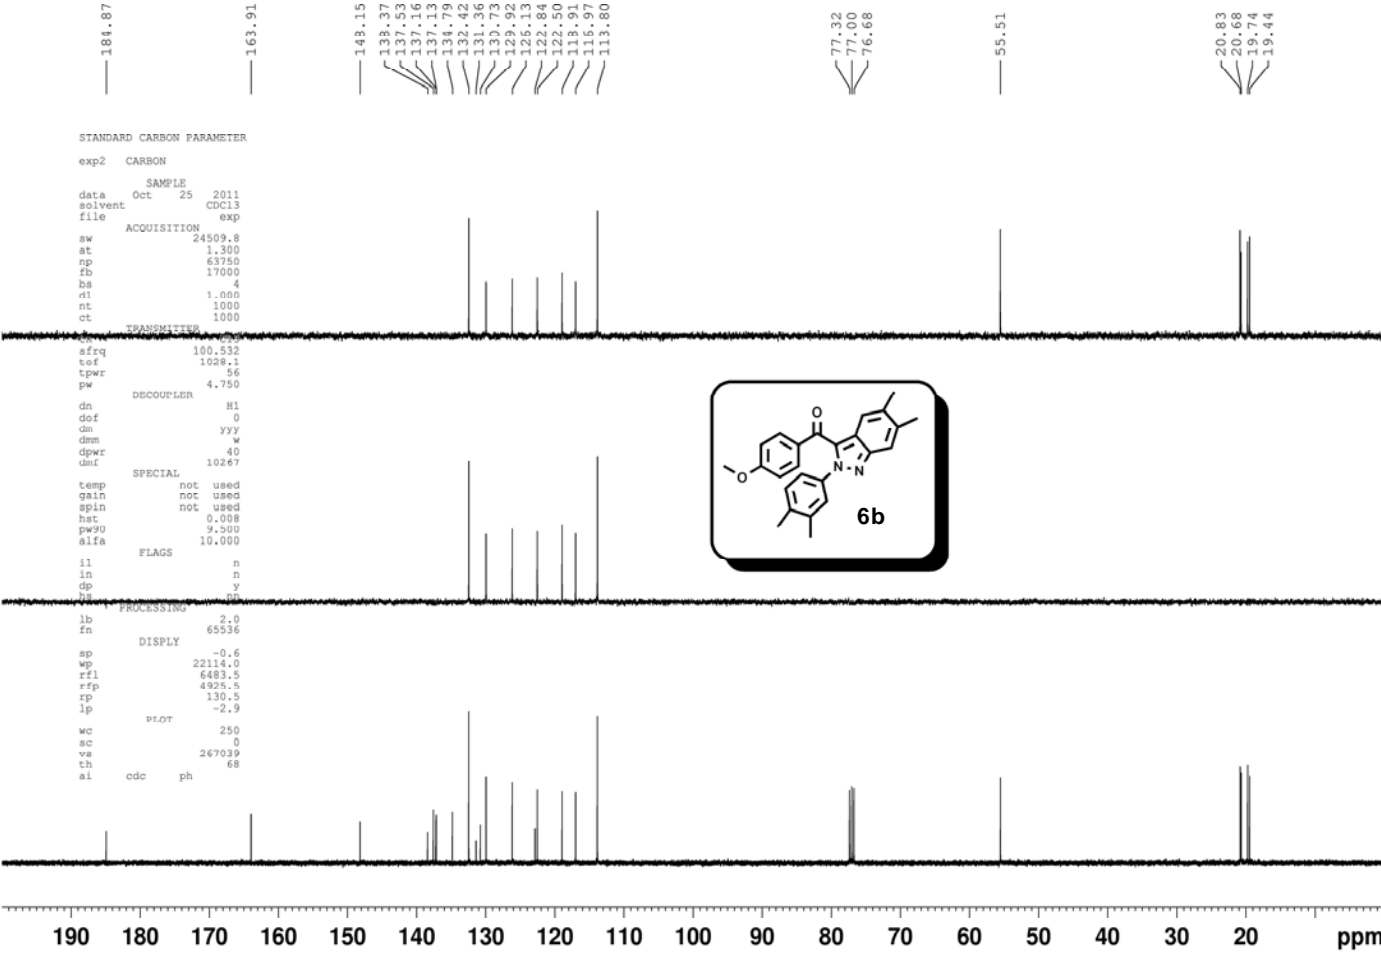

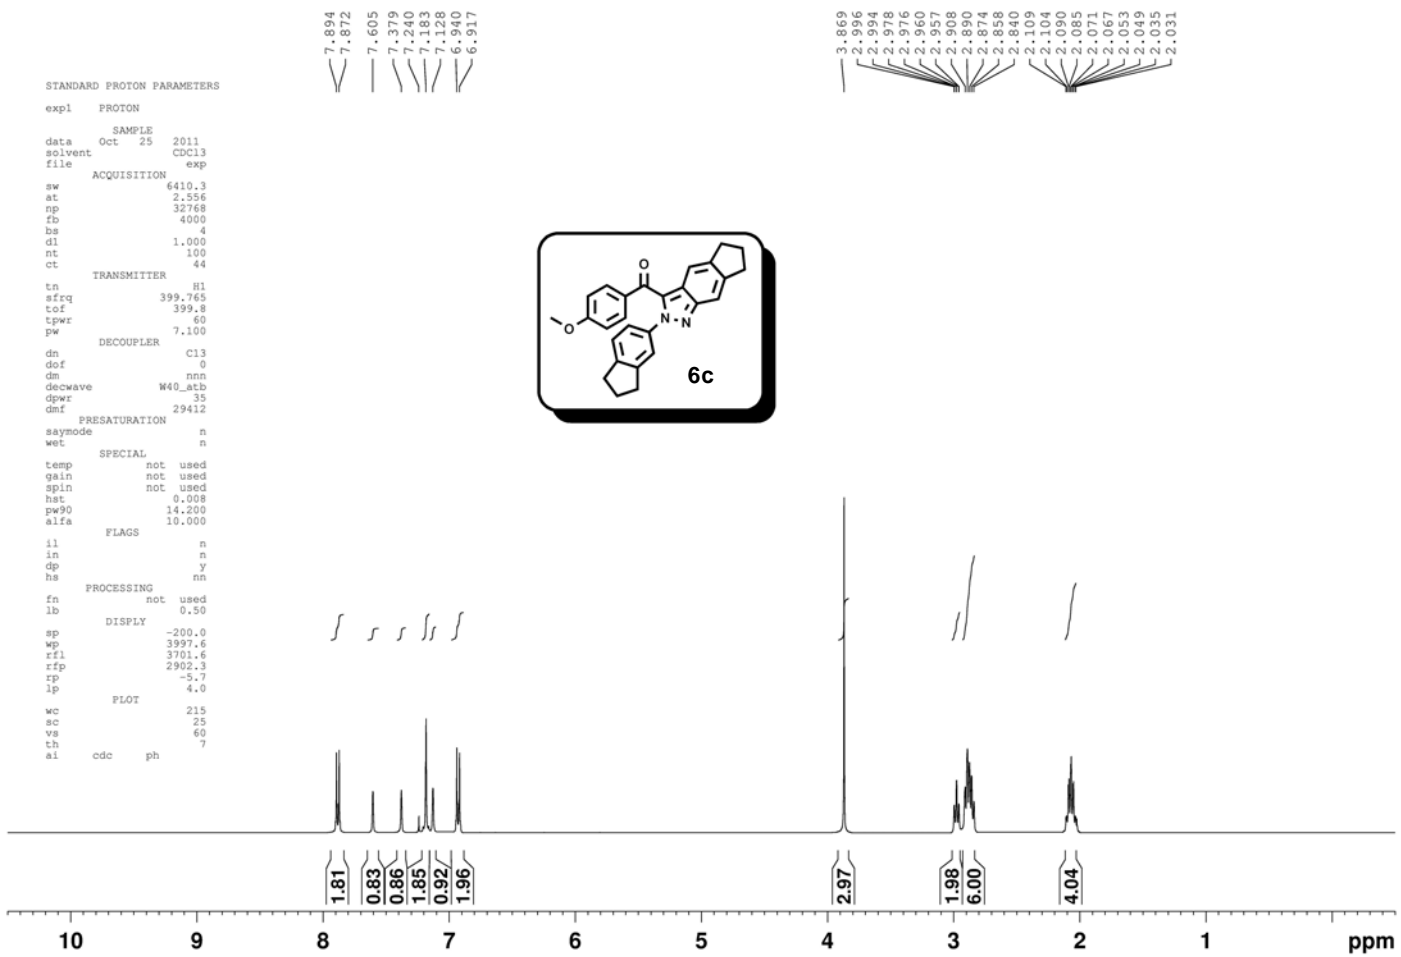

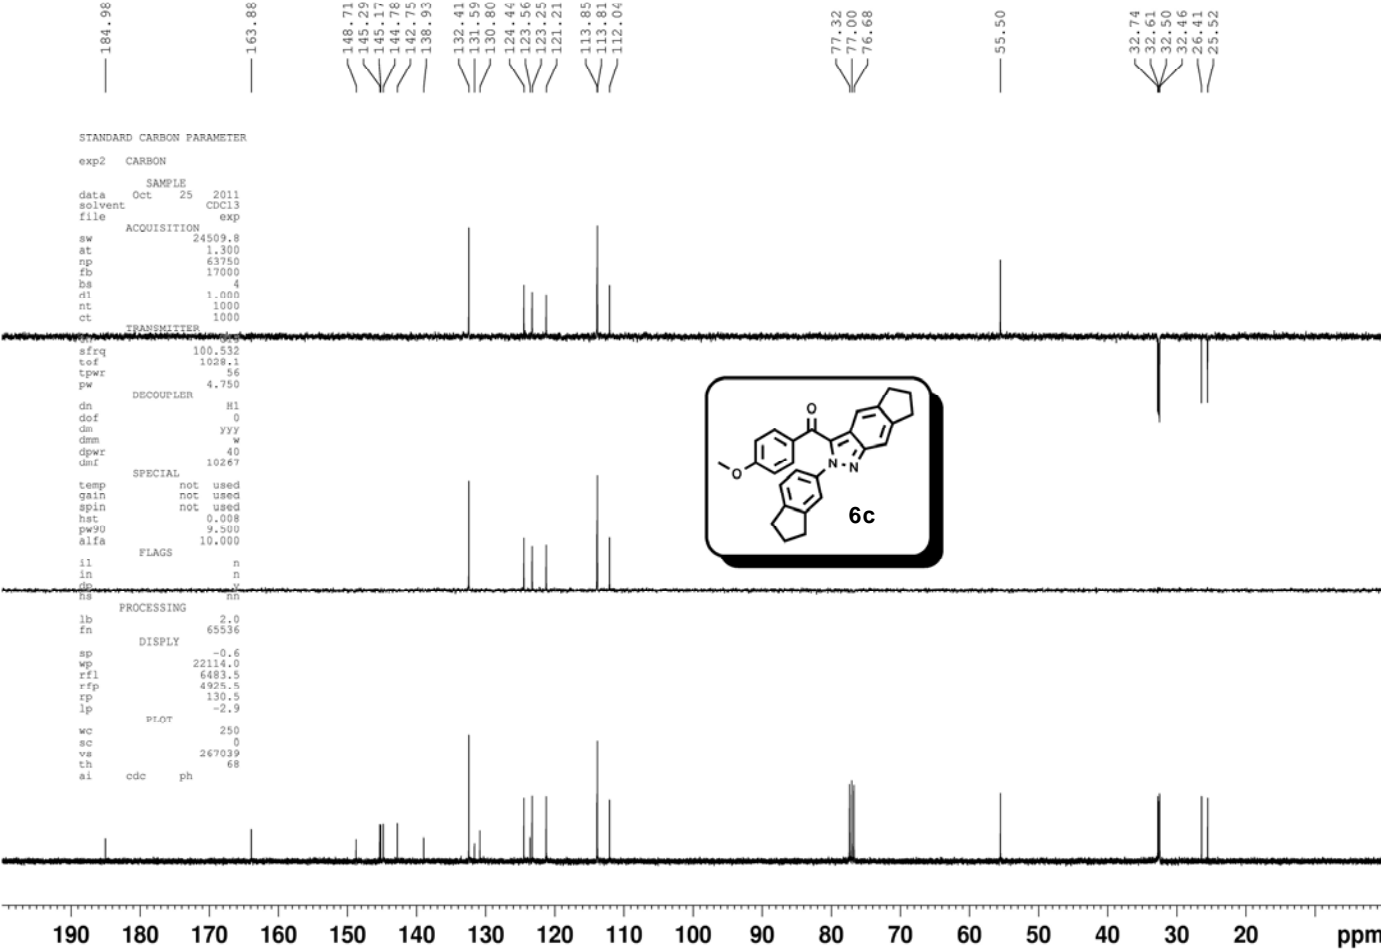

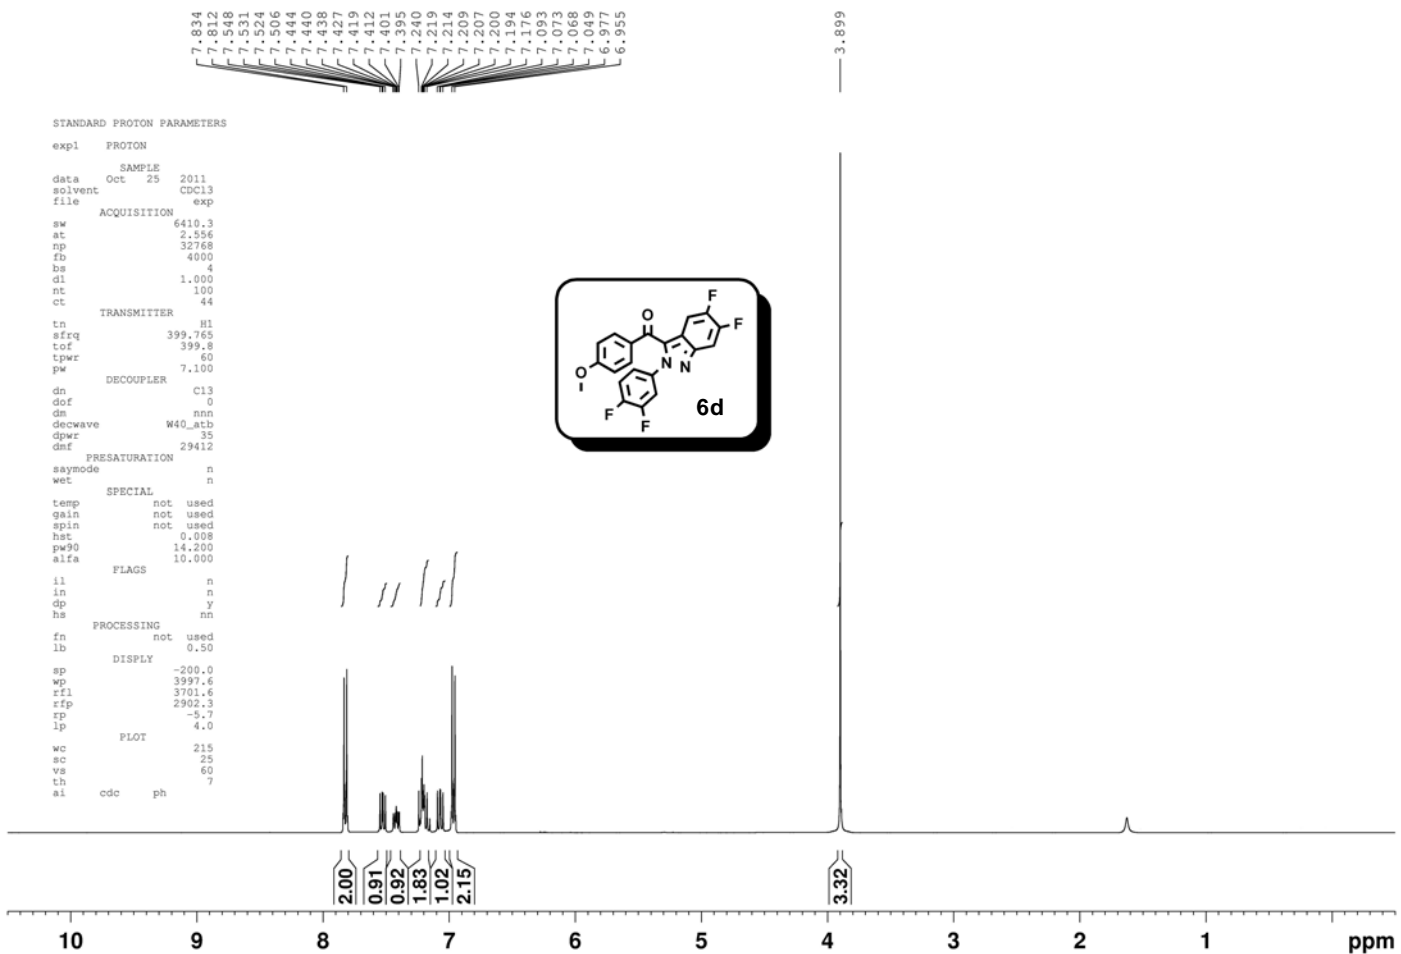

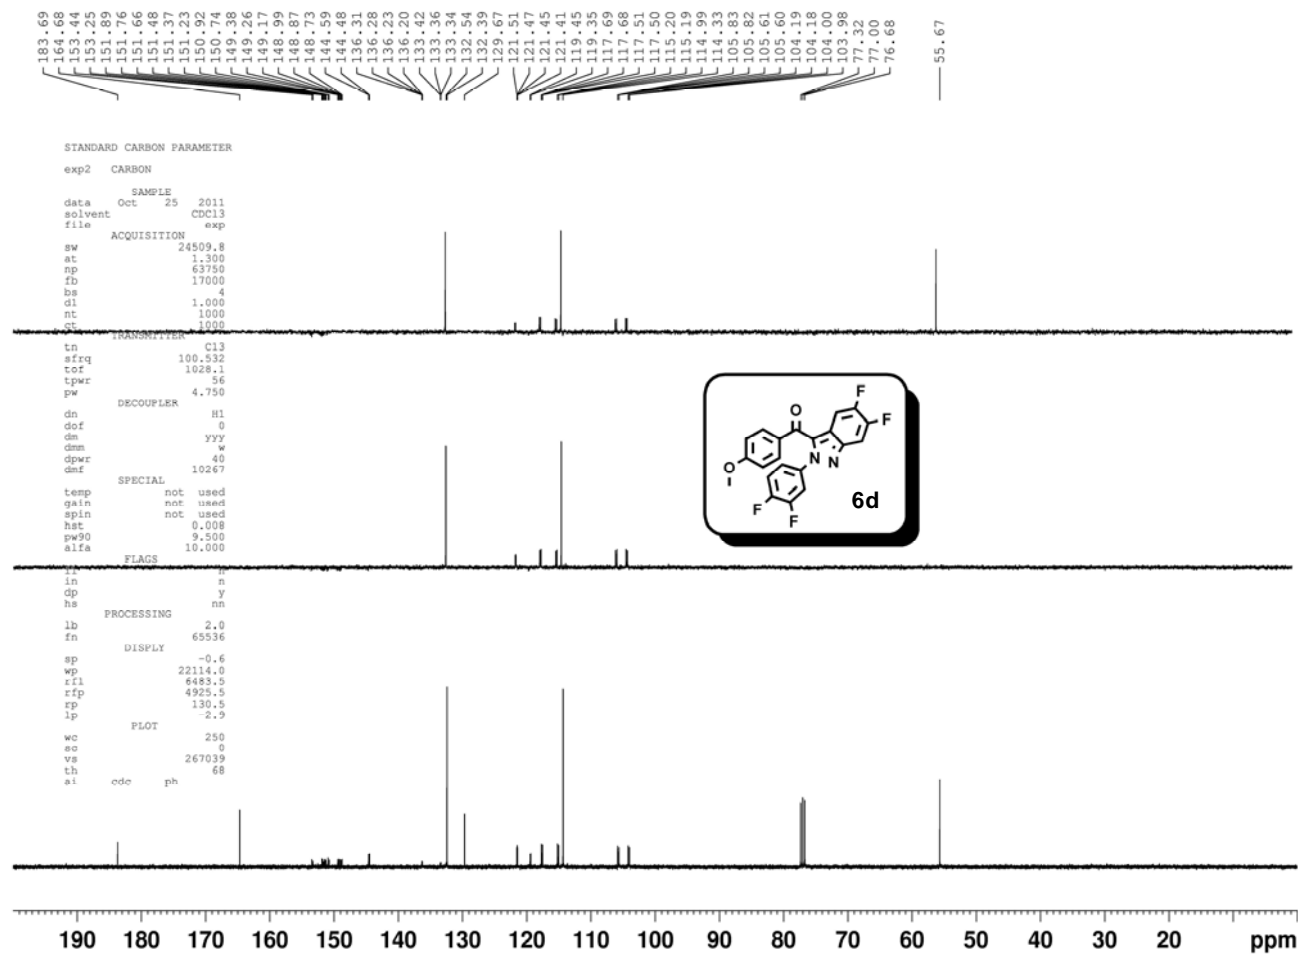

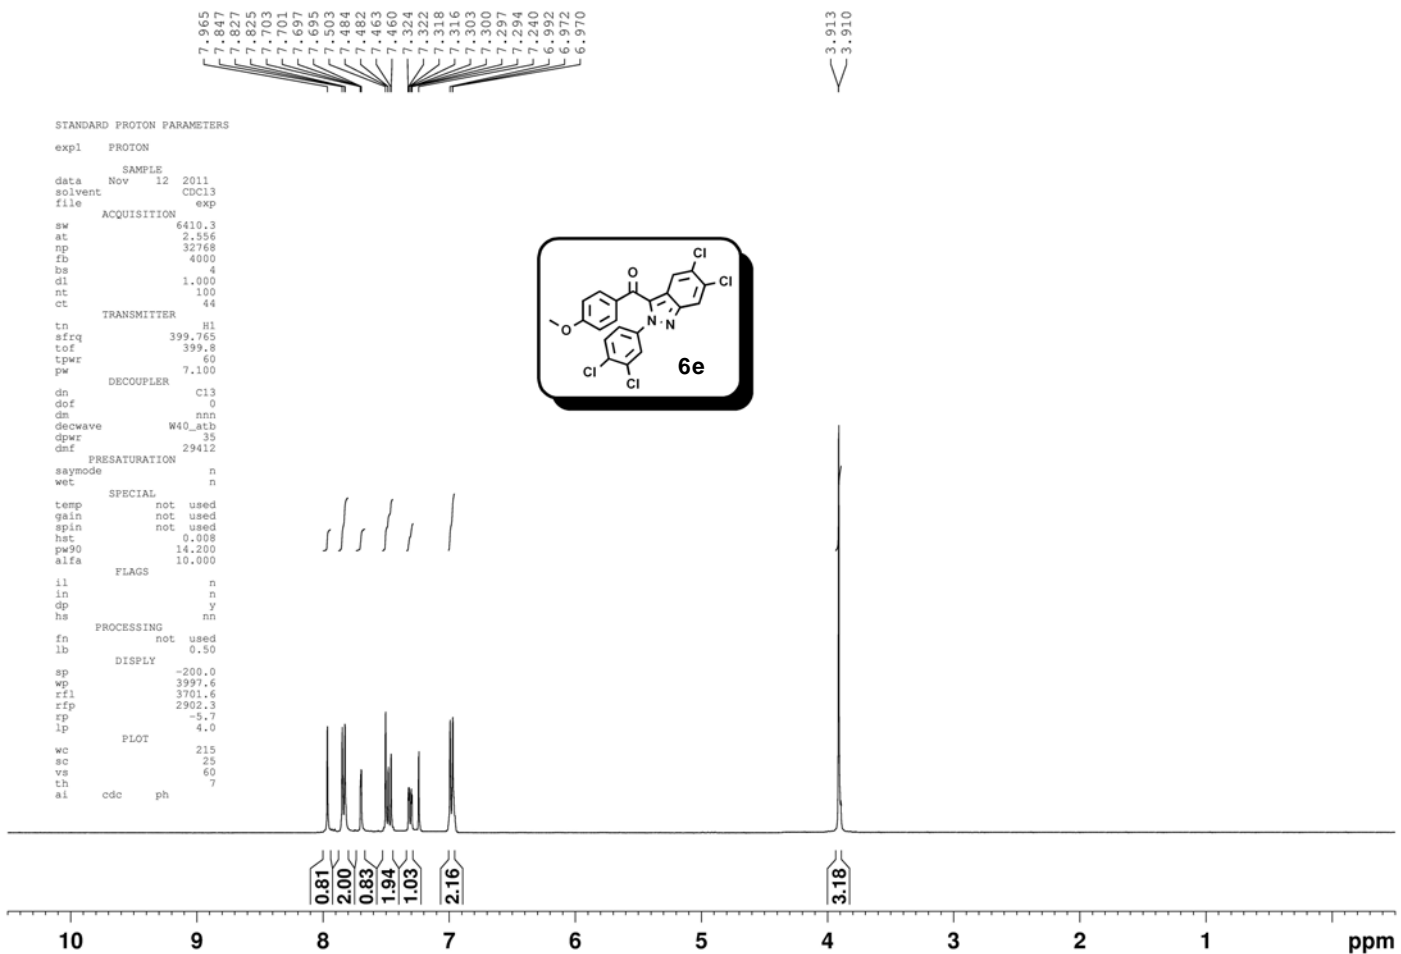

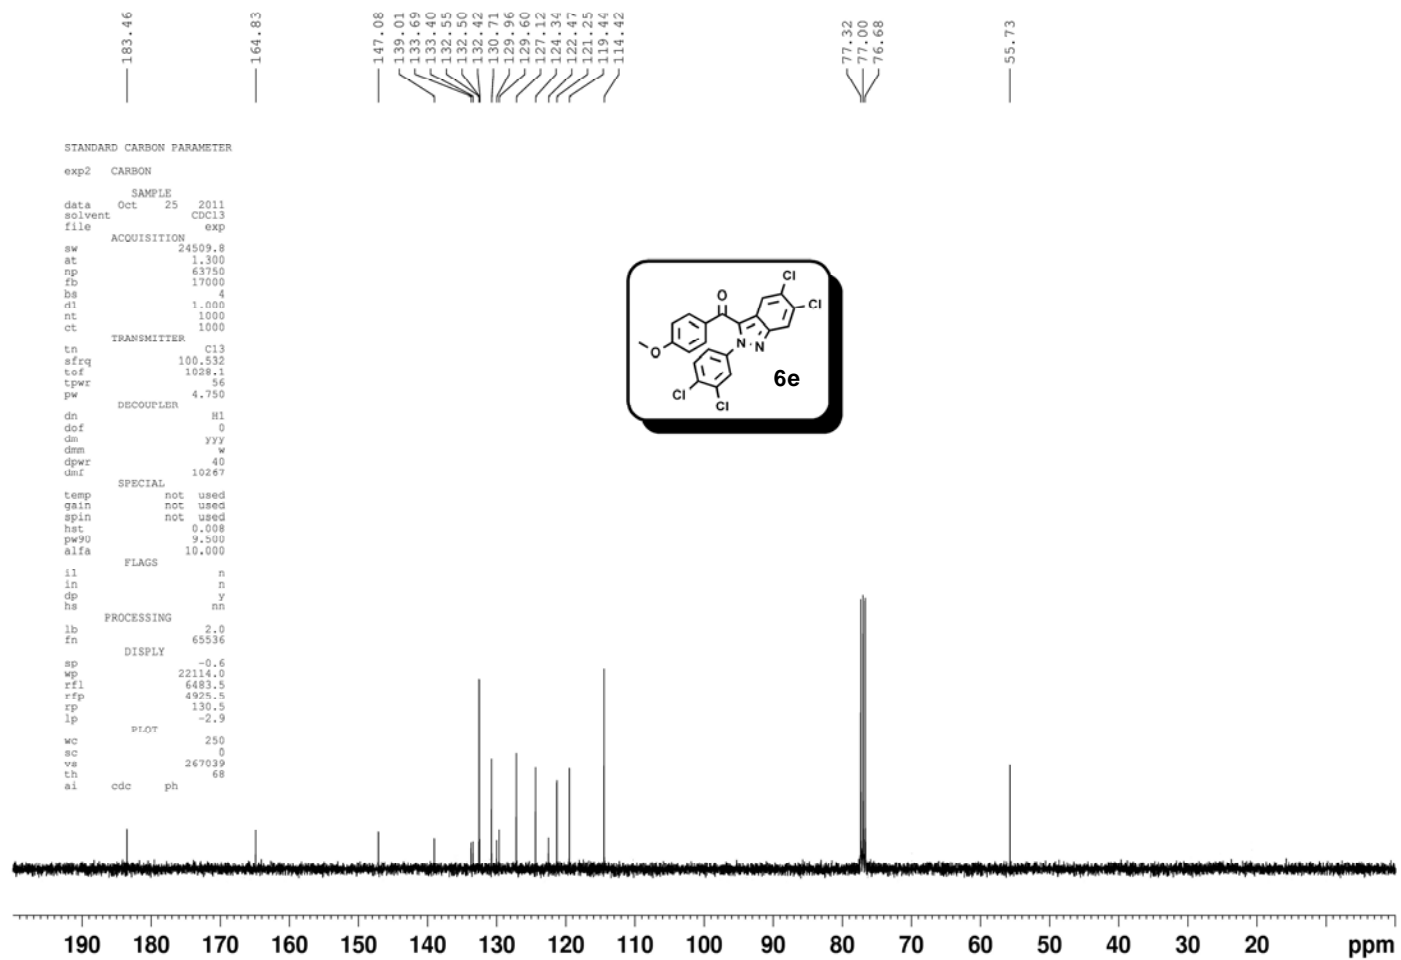

Supplement: c2ob26760h.pdf [file c2ob26760h.pdf]
